# Supplementary material for: Properties of exopolymeric substances (EPS) produced during cyanobacterial growth: potential role in whiting events
Source: Copernicus journal article supplement (doi:10.5194/bg-2023-51), 2023-04-06
Supplement: Supplementary file 1 [file bg-2023-51-supplement.pdf]

**Table 1S.** Attribution of main infrared absorption bands of EPS samples.

| EPS<br>(Exponential growth<br>phase) | EPS<br>(Early stationary<br>phase) | EPS<br>(Late stationary<br>phase) | Band<br>assignment          |
|--------------------------------------|------------------------------------|-----------------------------------|-----------------------------|
| Wavenumber (cm <sup>-1</sup> )       |                                    |                                   |                             |
| 3342                                 | /                                  | 3351                              | <i>n</i> OH                 |
| included in OH absorption<br>band    | 3281                               | included in OH absorption<br>band | Amide A ( <i>n</i> N–<br>H) |
| /                                    | 3077                               | /                                 | Amide B ( <i>n</i> N–<br>H) |
| 2927                                 | 2959, 2922, 2851                   | 2938                              | <i>n</i> C–H                |
| 1730                                 | /                                  | 1727                              | <i>n</i> C=O                |
| 1658                                 | 1648                               | 1650                              | Amide I ( <i>n</i> C=O)     |
| 1543                                 | 1542                               | 1549                              | Amide II ( <i>n</i> C–N)    |
| 1376                                 | 1448, 1401                         | 1375                              | <i>d</i> C–H                |
| /                                    | 1305                               | /                                 | Amide III ( <i>n</i> C–N)   |
| /                                    | 1242                               | 1244                              | <i>d</i> N–H                |
| 1136                                 | 1127                               |                                   | <i>n</i> C–O–C              |
| 1043                                 | 1070                               | 1038                              | <i>n</i> C–O                |
| 867                                  | /                                  | 811                               | <i>g</i> C–H                |
| 582                                  | /                                  | /                                 | <i>d</i> C–X                |

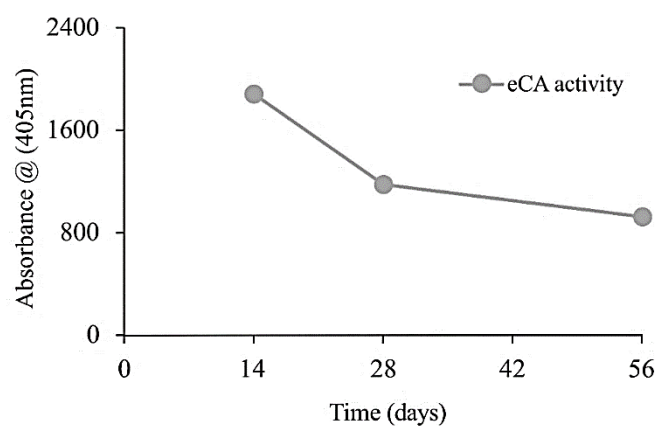

**Figure 1S.** Extracellular carbonic anhydrase (eCA) activity measured at days 14, 28 and 56 of *Synechococcus* PCC 7942 growth experiment.

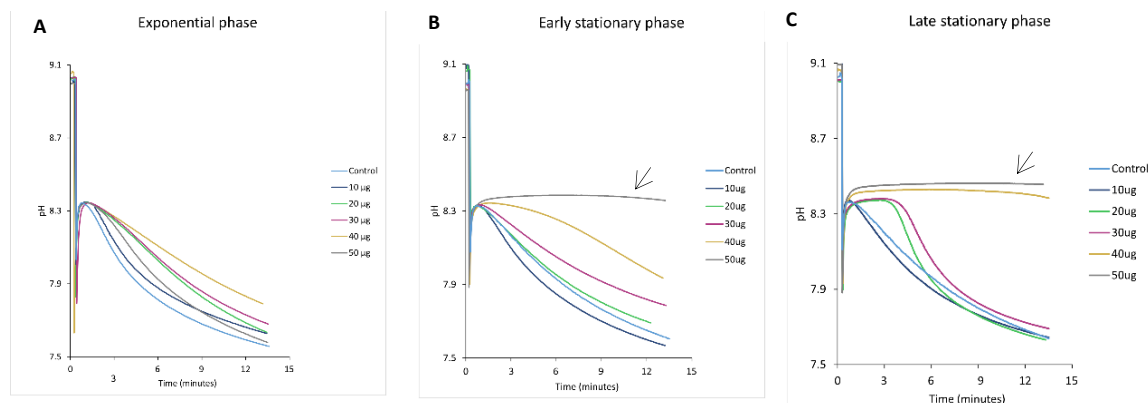

**Figure 2S.** Replication of the *in vitro* inhibition of calcium carbonate precipitation experiment by using EPS extracted during exponential (A), early (B) and late (C) stationary phases of *Synechococcus* growth experiment. A negative control (no EPS) and EPS extracts of concentrations of 10, 20, 30, 40, and 50  $\mu\text{g}\cdot\text{mL}^{-1}$  were used in the  $\text{CaCO}_3$  inhibition assay. The decrease of pH indicates precipitation and a plateau inhibition of carbonate mineral precipitation. A larger plateau ( $> 50 \mu\text{g}$ ) indicates stronger inhibition of calcium carbonate precipitation (e.g., see black arrows in panel B-C).

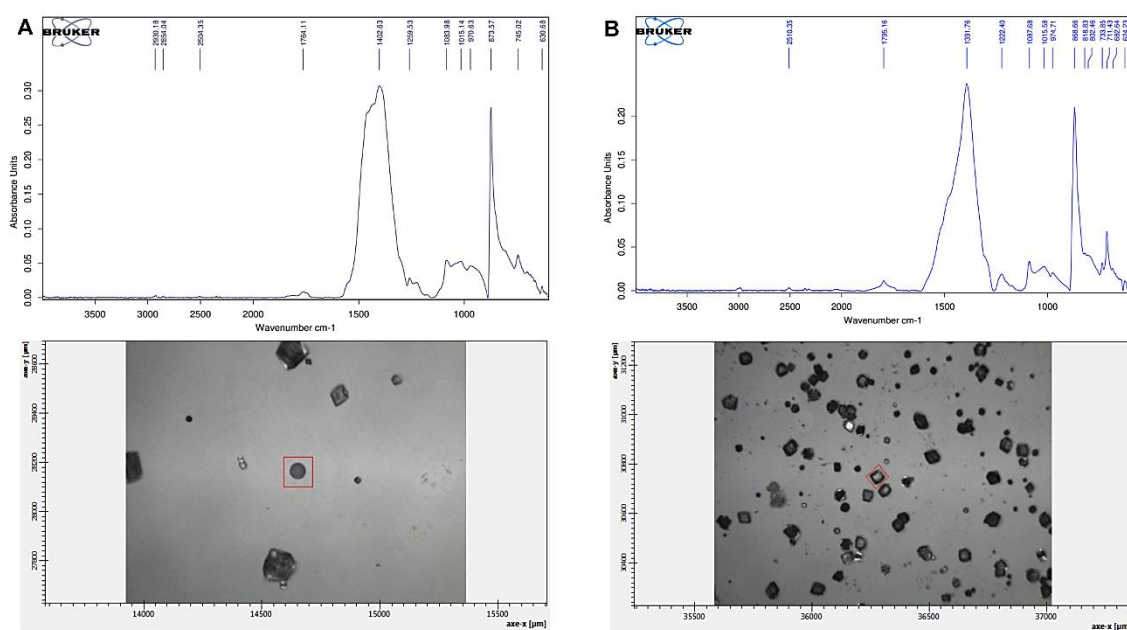

**Figure 3S.** FT-IR spectra of (A) vaterite and (B) calcite. The two calcium carbonate polymorphs precipitated in EPS solutions produced during two *Synechococcus* growth phases. Data shown EPS produced (A) during exponential growth phase a concentration of  $3 \mu\text{g}\cdot\text{mL}^{-1}$  and (B) during the late stationary phase with a concentration of  $36 \mu\text{g}\cdot\text{mL}^{-1}$ .
