# Supplementary material for: Properties of exopolymeric substances (EPS) produced during cyanobacterial growth: potential role in whiting events
Source: Copernicus journal article supplement (doi:10.5194/bg-2023-51), 2023-04-06
Supplement: Supplementary file [file bg-2023-51-AC2-supplement.pdf]

Report from Referee #2

**Manuscript BG-2023-51 manuscript:** “Properties of exopolymeric substances (EPS) produced during cyanobacterial growth: potential role in whiting events.”

1. **Referee #2: Dr. Tobias-Hunefeldt, Sven**  
[sven.hunefeldt@igb-berlin.de](mailto:sven.hunefeldt@igb-berlin.de)

Summary:

The authors investigated the role of EPS in carbonate precipitation during a *Synechococcus* bloom experiment. EPS characteristics were assessed with FT-IR spectroscopy, SDS-PAGE and forced carbonate mineral precipitation experiments. The authors separated the bloom into exponential, and early and late exponential stages. Stationary phases contained higher abundances of negatively charged groups than during the exponential phase, leading to smaller (< 50 µm) but more abundant carbonate minerals in the stationary phases, whereas the exponential phase contained larger (> 50 µm) but less abundant carbonate precipitates.

I believe this manuscript gives a small but important contribution to the field. I especially applaud the many different approaches taken to measure the EPS and associated factors. My comments mainly center around cutting down on the amount of references, only using the key ones, and ensuring that the different sections (introduction/results/discussion) don't intersect with each other. Other comments include ways to convey data reliability and acknowledging limitations.

Major comments:

The abstract should make clearer what techniques were used for measurements, at least the ones that the major findings were drawn upon.

**Author's response:** Thank you for this remark. We have followed your suggestion and this information is now added to the abstract (Lines 21-23).

The graphical abstract is well made and explains the stated findings well. However, I am unsure of what the 'Negatively charged groups' are, is it the connecting lines of the different phases?

**Author's response:** The negatively charged groups are represented by the “connecting lines” and resemble a honeycomb-like structure.

In that case I would remove the Exponential/Early stationary/Late stationary illustrations and explanations from the Legend.

**Author's response:** We acknowledge the reviewer's observation regarding the repetition of the terms "Exponential/Early stationary/Late stationary phase." In response, we have taken their suggestion and eliminated them from the legend and decided to keep it solely as subtitles in the Graphical abstract.

There are many references throughout the introduction and discussion, to the degree that the text in the intro is 50% references and 50% informative text. I would focus more on relevant and landmark references and use these key references to make your point. Rather than having 3-5 references for every statement. For example: L83-84: There are 3 references that say that cyanobacteria are known EPS producers, and then another 2 that state this is especially true during blooms. It would be best to have only those last two as they are the most relevant to your point.

**Author's response:** After thorough examination, we carefully reviewed the entire manuscript once again. As a result, we have made the decision to retain only the three most relevant references for each statement. We acknowledge the reviewer's point that certain subsections contained an excessive number of citations. However, it is important to emphasize that is a lab-based study in which we present a [theoretical] model that we have extrapolated to the natural system. To effectively integrate our findings with the natural system scenario, it is imperative to access wide range of disciplines and explore relevant literature.

Methods seem to match the stated goals of the study. Many measurements however were done in duplicate, with no justification as to why. Such as protein, sugar and glycosaminoglycan quantifications. Unless measurements were extremely similar, triplicates would convey a greater degree of measurement precision. I would recommend either measuring an additional sample (if available), stating the reason for why duplicates were chosen for this, or acknowledging this as a study limitation.

**Author's response:** Protein measurements were conducted in quadruplicate, sugar measurements in triplicate and GAGs (glycosaminoglycans) measurements in duplicate. The reported values in the study represent the mean of these measurements taken from two replicates of EPS samples. Therefore, the reported averages were obtained from a total of eight protein measurements, six sugar measurements and four GAG measurements. We have now included this information in the main text at lines 265-266.

As there were two experimental runs that were temporally displaced, I would have liked to see a brief comparison of their measurements to show that these two test runs are not significantly different.

**Author's response:** Comparison of pH and cell number measurements of Experiment 1 and Experiment 2 showed that they are not significantly different (p-value > 0.05, see Figure AA and Figure AB). This information is now included in the main text (Lines 192, 198).

| Anova: Single Factor |          |          |          |          |            |              |
|----------------------|----------|----------|----------|----------|------------|--------------|
| SUMMARY              |          |          |          |          |            |              |
| Groups               | Count    | Sum      | Average  | Variance | pH         |              |
| Column 1             | 6        | 58,48292 | 9,747153 | 0,923947 | Column 1   | Column 2     |
| Column 2             | 6        | 58,845   | 9,8075   | 0,735155 | Time (day) | Experiment 1 |
|                      |          |          |          |          | 0          | 8,24         |
|                      |          |          |          |          | 3          | 8,94         |
|                      |          |          |          |          | 14         | 10,28        |
|                      |          |          |          |          | 28         | 10,45        |
|                      |          |          |          |          | 41         | 9,89         |
|                      |          |          |          |          | 56         | 10,70        |
|                      |          |          |          |          |            | 10,52        |
| ANOVA                |          |          |          |          |            |              |
| Source of Variation  | SS       | df       | MS       | F        | P-value    | F crit       |
| Between Groups       | 0,010925 | 1        | 0,010925 | 0,01317  | 0,910906   | 4,964603     |
| Within Groups        | 8,29551  | 10       | 0,829551 |          |            |              |
| Total                | 8,306435 | 11       |          |          |            |              |

Figure AA. Anova Single-factor statistical test comparing pH values obtained from growth experiments 1 and 2.

| Anova: Single Factor |          |          |          |          |                          |              |
|----------------------|----------|----------|----------|----------|--------------------------|--------------|
| SUMMARY              |          |          |          |          |                          |              |
| Groups               | Count    | Sum      | Average  | Variance | cell density (cells.L-1) |              |
| Column 1             | 6        | 58,48292 | 9,747153 | 0,923947 | Time (day)               | Experiment 1 |
| Column 2             | 6        | 58,845   | 9,8075   | 0,735155 | 0                        | Experiment 2 |
|                      |          |          |          |          | 3                        |              |
|                      |          |          |          |          | 14                       |              |
|                      |          |          |          |          | 28                       |              |
|                      |          |          |          |          | 41                       |              |
|                      |          |          |          |          | 56                       |              |
| ANOVA                |          |          |          |          |                          |              |
| Source of Variation  | SS       | df       | MS       | F        | P-value                  | F crit       |
| Between Groups       | 0,010925 | 1        | 0,010925 | 0,01317  | 0,910906                 | 4,964603     |
| Within Groups        | 8,29551  | 10       | 0,829551 |          |                          |              |
| Total                | 8,306435 | 11       |          |          |                          |              |

**Figure AB.** Anova Single-factor statistical test comparing cell numbers obtained from growth experiments 1 and 2.

**Additionally, is there an explanation why experiment 1 had a 7 day and experiment 2 had a 14 day exponential phase?**

**Author's response:** Although the inoculum was consistent between Experiment I and II (we calculated the same final optical density), the initial cell count on day 0 was ~ 1.3 times higher in Experiment I ( $9.52 \times 10^{10} \text{ cells.L}^{-1}$ ) than in Experiment II ( $7.12 \times 10^{10} \text{ cells.L}^{-1}$ ). This difference in cell density could potentially account for the faster cell growth and shorter exponential phase observed in Experiment I.

**With the difference in exponential phase, why were the chosen sample days the same for both experiments? Specifically: D0, D14, D8, D56.**

**Author's response:** In our previous publication (Martinho de Brito et al., 2022), we demonstrated that the exponential growth phase of *Synechococcus* spp. lasts for a minimum of 18 days. Based on this finding, we selected day 14 as the first sampling point in the current study, representing the mid of the exponential phase. The choice of the second sampling point was based on the observed stability in cell numbers and pH values in Experiment 1, suggesting the transition from the exponential phase to the stationary phase. Thus, we selected day 28 for the second sampling point. Initially, we anticipated sampling during the death phase for the final time point. However, as stated in the main text, we did not observe a distinct death phase during the 56-day experiment. Consequently, we collected the last sample during the late stationary phase. For Experiment II, we established the same sampling time to correlate the obtained data with EPS production. Although the number of cells may not be the same in both experiments, the growth stages of the cultures overlap significantly (p-value = 0.91).

**By picking only crystals above 10 µm, could this be introducing some bias? Or was the 10 µm limit chosen due to methodological limitations? If yes, should be stated. Otherwise, the 10 µm size cut off should be justified.**

**Author's response:** Based on the observations made during the precipitation experiment, we identified two primary size classes. To analyze these size classes, we used an image analysis software and selected two crystal size classes: crystals with a size < 50 µm and crystals with a size > 50 µm. It is important to note that the < 50 µm size class encompasses all crystals ranging from 0 µm to < 50 µm, which includes crystals smaller and larger than 10 µm. Therefore, crystals above 10 µm were counted and their counts are included in the reported results. Please refer to the "Crystal count and size distribution" (Subsection 2.6.2) in the Materials and Methods section for a more detailed explanation of this counting process.

**Please add confidence intervals/standard deviations to Figure 5.**

**Author's response:** Each one of the curves shown in Figure 5 represents pH values that were measured at a frequency of every 2 seconds, resulting in a minimum of 400 measurements per curve. Due to the large number of measurements and to maintain the clarity of the graph, we opted not to include the standard deviation (SD) for each curve. Including the SD in the graph would render it unreadable and overcrowded. However, it is important to note that the general trend is preserved. We have included a supplementary Figure (Figure 2S) that displays the replication of the *in vitro* inhibition of calcium carbonate precipitation, demonstrating the consistent pattern observed in the main figure.

**I would also like to see the statistics represented on all relevant figures. Between negative controls and measured values, as well as between time points.**

**Author's response:** After a careful examination of all the tables and figures of the manuscript, we confirmed that only Table 1 was lacking the addition of standard deviations (SD). We have now corrected this error and added the necessary SD values to Table 1. Please refer to Table 1 (Lines 213-215) in the manuscript for this updated information.

**Please increase the readability of the introduction and discussion, lots of results were included and some points are made and justified either in the next discussion section or 20 lines below. Based on this there were some other points to make:**

**As EPS characteristics are phytoplankton/organism specific it should be noted that these findings need to be expanded on with additional studies and other phytoplankton.**

**Author's response:** We acknowledge the reviewer's valuable input regarding this significant aspect. As a result, we have included the relevant information in the Discussion section of the manuscript (Line 476).

**Tables and Figures that were already presented in the results section should not be mentioned again in the discussion.**

**Author's response:** We have implemented changes throughout the entire text to address this concern. Specifically, we have removed several references to tables and figures from the discussion section, as suggested by the reviewer.

**The same is true for the discussion section, do not reiterate results in this section, but rather focus only on the implications and what this means for the field.**

**Author's response:** We have made revisions and modifications to the Discussion section as required.

**Ensure that conclusion drawn from the data are found only in the discussion, and not in the results. Such as L276, L278-279.**

**Author's response:** We have removed these sentences from the Results section and that information is now included in the Discussion section.

**Please ensure that you do not discuss or provide justification for the chosen methods in your results, but rather in the introduction, methods section, or discussion (as relevant).**

**Author's response:** We have changed the text accordingly.

**Please make clear how discussion L381-399 relates to whiting events. The text is very information dense, however how it relates to phytoplankton associated whiting events is not clearly stated.**

**Author's response:** We agree that there is significant repetition within this paragraph. As some of this information was already presented in the Introduction section, we have condensed the paragraph into three lines for brevity and clarity. Please refer to Lines 451-454 for the summarized version.

**I believe it would help to have L400-417 before L381-399 or remove L381-399 from the manuscript.**

**Author's response:** After careful consideration, we have decided to retain the original version of Lines 381-399. We believe that this section presents the narrative in a logical and comprehensive manner. Our aim was to establish a connection between cell growth/metabolic activity (high photosynthetic activity and high pH levels and alkalinity, as well as CO<sub>2</sub> limitation) with EPS production, exploring its impact on carbonate precipitation. The same structured approach was consistently applied throughout the discussion of all *Synechococcus* growth stages, as outlined in Sections 4.1, 4.2, and 4.3.

**As EPS characteristics are phytoplankton/organism specific it should be noted that these findings need to be expanded on with additional studies and other phytoplankton.**

**Author's response:** We acknowledge the reviewer's valuable input regarding this significant aspect. As a result, we have included the relevant information in the Discussion section of the manuscript (Line 476).

**Minor comments (please also see attached pdf with comments):**

**The limit of detection was stated in  $\mu\text{g}\cdot\text{L}^{-1}$  in text, however Table 1 values are in  $\mu\text{M}$ . The same units should be used throughout the manuscript.**

**Author's response:** The limit of detection was modified and is now expressed in  $\mu\text{M}$  (Line 209).

**I would also be interested in day 0 values throughout the text, as it was stated that they were measured but are not shown in the manuscript.**

**Author's response:** We agree that this was confusing as stated and we have rectified it by amending the caption of Table 1 (Line 212). The measurements were done in the medium before the inoculation ( $t_0$ ). Therefore, in Table 1,  $t_0$  corresponds to the column entitled "Initial concentrations in the medium".

**Only Figure 2 is required. Table 2 should then be relegated to the supplementary.**

**Author's response:** We prefer to keep Table 2 and Figure 2 in the main text as they complement each other. The calculations of cell-specific EPS production described in Figure 2 were derived from the data presented in Table 2, which includes information on cell yield and EPS production at the three different growth stages. By including both Table 2 and Figure 2, we aim to enhance the clarity and comprehension of the study's findings.

**FT-IR mentions a lot of different spectra, it would be best to only focus on the ones from the discussion or those relevant to the findings.**

**Author's response:** We strongly believe that providing a comprehensive description of the Infra-Red spectra is highly useful for a deeper comprehension of the EPS, including its composition and structure. To our knowledge, there is still limited availability of this type of information for exopolymeric substances. Therefore, we emphasize the importance of highlighting and describing all the peaks in the spectra. Additionally, we would like to emphasize that the other reviewer of this paper suggested moving Table 1S "Attribution of main infrared absorption bands of EPS samples" from the supplementary materials to the main text due to its relevance. The reviewer found this information highly pertinent, further reinforcing the significance of including it in the main text.

**Can Figure 4 be redone with the inclusion of a negative control?**

**Author's response:** Usually the use of Alcian Blue (AB) does not require a negative control since it is not expected to stain non-polyanionic substances such as proteins and sugars. This is a commonly accepted practice, and several studies examining polyanionic matrices on gels have been published without including a negative control (Marie et al., 2007; Gaspard et al., 2008). There are instances where non-polyanionic matrices exhibit no staining at all with AB, as demonstrated by Pavat et al. (2012). Moreover, in our gel, the lane corresponding to the molecular weight (MW) ladder can be considered as an appropriate negative control.

# Properties of exopolymeric substances (EPS) produced during cyanobacterial growth: potential role in whiting events

Marlisa Martinho de Brito<sup>1\*</sup>, Irina Bundeleva<sup>1</sup>, Frédéric Marin<sup>1</sup>, Emmanuelle Vennin<sup>1</sup>, Annick Wilmotte<sup>2</sup>, Laurent Plasseraud<sup>3</sup> and Pieter T. Visscher<sup>1,4</sup>.

<sup>1</sup>Biogeosciences Laboratory, Department of Life, Earth and Environmental Sciences, University of Bourgogne Franche-Comté, 21000 Dijon, France

<sup>2</sup>InBios Research Unit, Department of Life Sciences, Faculty of Sciences, University of Liège, 4000 Liège, Belgium

<sup>3</sup>ICMUB Institute of Molecular Chemistry (CNRS UMR CNRS 6302), University of Burgundy-Franche-Comté, 21000 Dijon, France

<sup>4</sup>Department of Marine Sciences, The University of Connecticut, Groton, CT 06340, USA

Correspondence to: Marlisa Martinho de Brito ([marlisa\\_de-brito@etu.u-bourgogne.fr](mailto:marlisa_de-brito@etu.u-bourgogne.fr))

## Abstract

Extracellular polymeric substances (EPS) are an important organic carbon reservoir in many pelagic and benthic environments. The production of EPS is intimately associated with the growth of phyto- and picoplankton. EPS plays a critical role in carbonate precipitation through the binding of cations and by acting as a nucleation site for minerals. Large-scale episodes of fine-grained calcium carbonate precipitation in the water column (whiting events) have been linked to cyanobacterial blooms, including of *Synechococcus* spp.. The mechanisms that trigger these precipitation events are still debated. We pose that the cyanobacterial EPS, produced during exponential and stationary growth phases plays a critical role in the formation of whittings. The aim of this study was to investigate the production of EPS during a two-month cyanobacterial growth, mimicking a bloom. The production and characteristics of EPS were examined in different growth stages of *Synechococcus* spp. using various techniques such as FT-IR spectroscopy, colorimetric and SDS-PAGE assays. We further evaluated the potential role of EPS in carbonate precipitation through *in vitro* forced precipitation experiments. EPS produced during the early and late stationary phase contained a larger amount of negatively charged groups than present in EPS produced during the exponential phase. Consequently, a higher Ca<sup>2+</sup> binding affinity of the stationary phase-EPS led to the formation of a larger amount of smaller carbonate minerals (<50 μm) compared to crystals formed in exponential phase-EPS, which were less abundant and larger (> 50 μm). These findings were used to establish a conceptual model for picoplankton bloom-mediated CaCO<sub>3</sub> precipitation that can explain the role of EPS in whittings (see graphical abstract).

## Graphical abstract

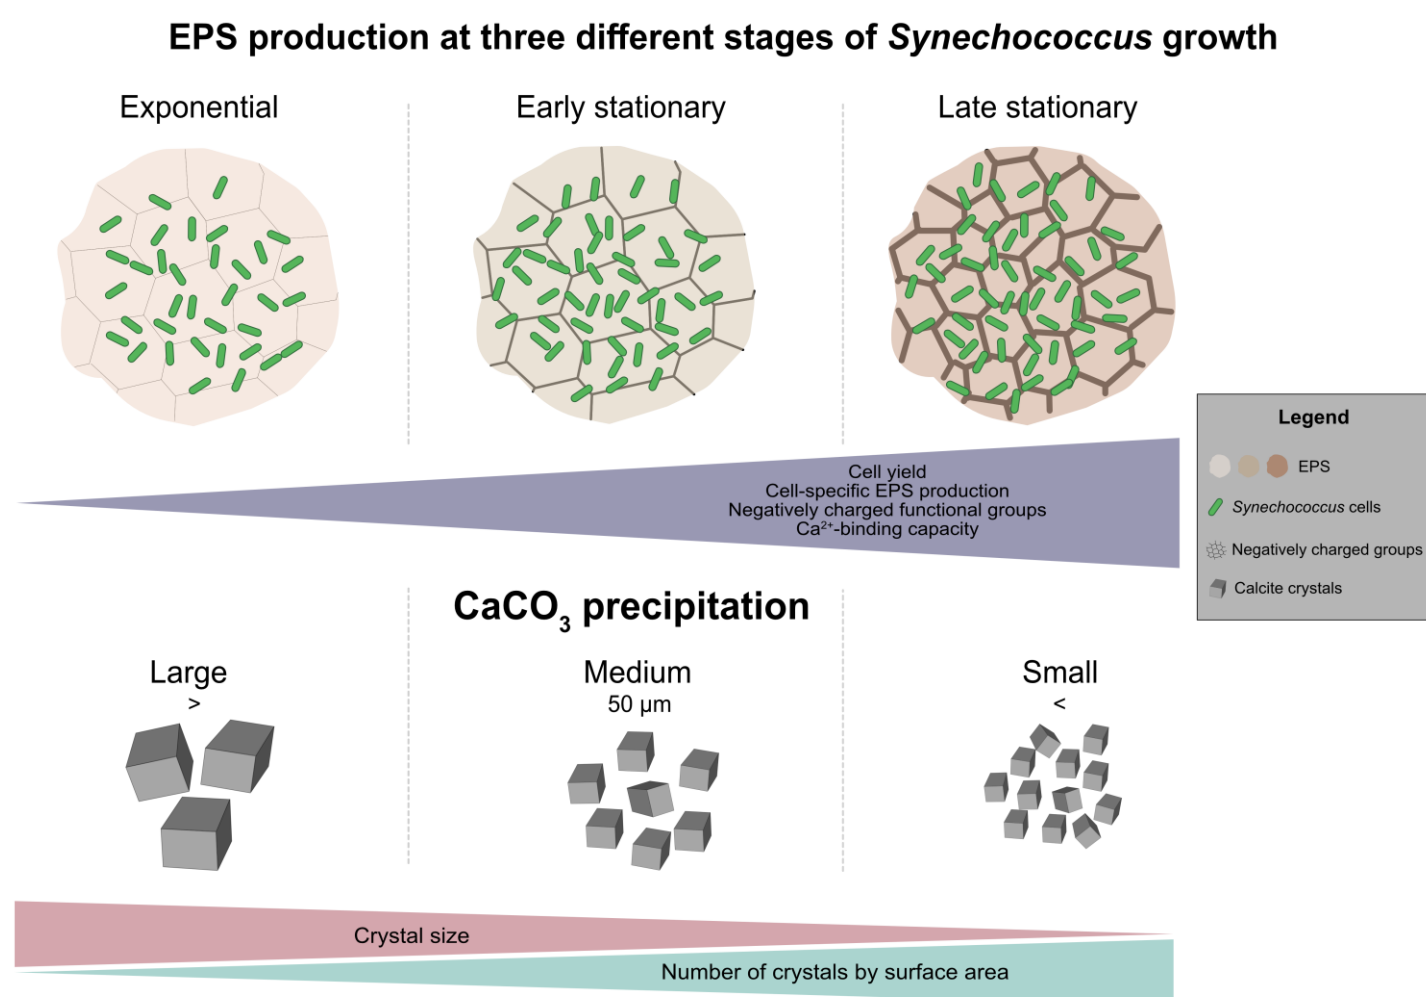

## 1. Introduction

### 1.1 Significance of this study

Massive carbonate precipitation episodes in the water column, also referred to as ‘whiting events’ are a well-known phenomenon of modern freshwater (Schultze-Lam et al., 1997; Hodell et al., 1998; Stanton et al., 2021) and marine environment (Shinn et al., 1989; Robbins and Blackwelder, 1992; Larson and Mylroie, 2014). Whittings are caused by large-scale precipitation of micron-sized calcium carbonate particles (visible from space) and represent a major sink in the carbon cycle. The particles associated with whittings can make up a major sedimentary constituent of the modern-day and ancient carbonate rock records (Pomar and Hallock, 2008). Whiting events can be triggered by a combination of biological and physicochemical processes. Among the biological mechanisms that have been studied in this context, picocyanobacterial proliferations have often been invoked in the initiation of whittings (Hodell et al., 1998; Thompson, 2000; Obst et al., 2009). Photosynthesis increases pH levels and alkalinity during cyanobacterial blooms, ultimately causing the saturation state of calcium carbonate to rise, thereby leading to its potential precipitation. The role of *Synechococcus* spp. bloom-forming cyanobacteria in CaCO<sub>3</sub> precipitation has been demonstrated in laboratory experiments (Yates and Robbins, 1998; Dittrich et al., 2003; Obst et al., 2009; Bundeleva et al., 2014; Martinho de Brito et al., 2022) and observed in field investigations (Wells and Iling, 1964; Thompson et al., 1990; Dittrich and Obst., 2004). Change in temperature, salinity, CO<sub>2</sub> pressure as well as turbulence are some of the physicochemical factors

44 that can lead to the formation of supersaturated solutions and subsequent precipitation of  $\text{CaCO}_3$  thus initiating the whiting. Even though several possible biogenic  
45 and abiotic mechanisms have been identified, the formation of whittings is still poorly understood.

## 46 **1.2 Overview of phytoplankton blooms**

47 Phytoplankton blooms, including those of picoplankton, are dense accumulations of cells resulting in a visible discoloration of the surface water layers (Reynolds and  
48 Walsby, 1975; Huisman et al., 2018). Their occurrence has been recorded worldwide in marine and freshwater bodies (Paerl et al., 2001; Paerl and Huisman, 2008;  
49 Ploug, 2008). Light intensity, water temperature, nutrient availability, weather conditions and hydrodynamics are key factors that determine the onset and persistence  
50 of a bloom. Blooms are typically seasonal, frequently observed during late spring or summer, and can be dominated by picoplankton (Huisman et al., 2018). Some  
51 phytoplankton organisms, notably cyanobacteria, may produce toxins and form large-scale harmful algal blooms (Paerl et al., 2001). The intensity and frequency of  
52 cyanobacterial blooms have been increasing due to anthropogenic eutrophication (Heisler et al., 2008; O'Neil et al., 2012), a trend expected to exacerbate due to  
53 climate change (Lürling et al., 2018). Cyanobacteria comprise a diverse group of photoautotrophic organisms that play a pivotal role in global primary production and  
54 are key players in the biogeochemical cycles of carbon, nitrogen and oxygen (Callieri and Stockner, 2000; Raven et al., 2017). The unicellular cyanobacterium  
55 *Synechococcus* is one of the most abundant photosynthetic microorganisms on Earth (Whitton and Potts, 2012), which contribute substantially to the picoplankton  
56 community in marine (Murphy and Haugen, 1985; Coello-Camba and Agustí, 2021) and freshwater environments (Weisse, 1993) that can form dense blooms  
57 (Schultze-Lam et al., 1992; Philips et al., 1999; Dittrich and Obst, 2004).

## 58 **1.3 Phytoplankton blooms and $\text{CaCO}_3$ precipitation**

59 During the occurrence of dense phytoplankton blooms, high rates of photosynthetic activity lead to a rapid depletion of  $\text{CO}_2$  in the surface waters, increasing alkalinity.  
60 Depending on the buffering capacity of the water, this could result in pH values  $\geq 9$  to as high as 11 (Ibelings and Maberly, 1998; Zepernick et al., 2021). Consequently,  
61 the inorganic carbonate equilibrium shifts towards carbonate ( $\text{CO}_3^{2-}$ ). Some cyanobacteria possess a carbon concentrating mechanism (CCM) that converts  $\text{HCO}_3^-$  to  
62  $\text{CO}_2$  through the action of carbonic anhydrase enzymes (Price et al., 1998; Badger et al., 2002) and produce hydroxide ions (Kupriyanova and Pronina, 2011). The  
63 activity of extracellular carbonic anhydrase (eCA) may contribute to the create an alkaline microenvironment in the extracellular polymeric substances (EPS)  
64 surrounding the cyanobacterial cells (Price et al., 2002; Dupraz et al., 2009). When  $\text{OH}^-$  ions are released during photosynthesis it causes the pH to rise, which favors  
65 carbonate mineral precipitation, assuming there are enough calcium ions available (Kamennaya et al., 2012). Consequently, during blooms, carbonate minerals can  
66 form on EPS or precipitated in the microenvironment surrounding cyanobacterial cells.

## 67 **1.4 The role of EPS**

68 Cyanobacteria are known producers of EPS, especially during blooms (Pannard et al., 2016; Liu et al., 2018). EPS serve as a boundary between cells and their  
69 immediate environment (Whitton and Potts, 2012) and may act as a template for  $\text{CaCO}_3$  nucleation (Dupraz and Visscher, 2005; Dupraz et al., 2009; Kamennaya et  
70 al., 2012). EPS are high molecular weight organic molecules composed of polysaccharides, proteins, nucleic acids and lipids (Pereira et al., 2009; Marvasi et al., 2010;  
71 Decho and Gutierrez, 2017). This complex mixture of molecules may contain specific monomer components, such as uronic or sialic acids (monosaccharides), aspartic  
72 or glutamic acids (amino acids) or functions (sulfate, phosphate), which carry negative charges in physiological conditions and can therefore bind cations, such as  
73  $\text{Ca}^{2+}$ , and promote the nucleation of  $\text{CaCO}_3$  crystals (Trichet and Defarge, 1995; Dupraz et al., 2009; Walker et al., 2019). Conversely, polyanionic EPS in solution  
74 can inhibit crystal growth by poisoning the faces of growing nuclei by an adsorption mechanism, according to a classical and accepted view prevailing for other  
75 macromolecules of similar charge properties: synthetic peptides (Wheeler et al., 1991), skeletal proteins (Wheeler et al., 1981; Addadi and Weiner, 1985), coccolith-  
76 associated polysaccharides (Borman et al., 1982) or natural organic matter dissolved in seawater (Mitterer and Cunningham, 1985). The production and composition  
77 of EPS differ among different species of microorganisms and their type of metabolism and depend on environment in which they live, stressors (e.g., nutrient  
78 availability, pH, temperature, light, salinity) and the stage of their growth (Pereira et al., 2009; Pannard et al., 2016; Martinho de Brito et al., 2022). The deprotonation  
79 of functional groups at elevated pH enhances the binding capacity of cations such as  $\text{Ca}^{2+}$  and controls crystal nucleation and growth by reducing the interfacial energy  
80 barrier between the crystal and the EPS substrate (Dupraz et al., 2009; Dittrich and Sibling, 2010). EPS play a two-fold role in carbonate formation by initially inhibiting  
81 (through  $\text{Ca}^{2+}$  binding) and subsequently promoting carbonate precipitation by releasing calcium ions during EPS alteration and degradation (Dupraz and Visscher,  
82 2005). Furthermore, through specific functional group composition and structural architecture, EPS may also exert control over the mineralogy, morphology and/or  
83 abundance of the minerals that are formed (Trichet and Defarge, 1995; Dupraz et al., 2009).

## 84 **1.5 The goal of this study**

85 We have previously reported that the pH of *Synechococcus* cultures increased when grown in a non-buffered medium (Martinho de Brito et al., 2022). In these growth  
86 conditions, the production of EPS was enhanced compared to growth in a buffered medium. Furthermore, the EPS from cells grown in non-buffered conditions  
87 contained more negatively-charged functional groups that impacted the properties of the carbonate minerals that precipitated. The current study further investigates  
88 the properties of EPS produced during different growth phases of *Synechococcus* spp. Over an extended incubation time (mimicking a prolonged natural bloom). We  
89 aim to better understand the role of cyanobacterial blooms in carbonate precipitation through EPS production and develop a conceptual model of picoplankton-  
90 mediated organomineralization to explain the biological origin of whiting events.

## 91 **2. Materials and Methods**

### 92 **2.1 *Synechococcus* PCC7942 strain and culture growth conditions**

93 *Synechococcus* PCC7942 was obtained from the Centre de Ressources Biologiques de l'Institut Pasteur (Paris). Cultures were grown in a one-third-strength, non-  
94 buffered liquid BG-11 medium (Allen, 1968; Rippka et al., 1979). The medium consists of (per liter): 1.5 g of  $\text{NaNO}_3$ ; 0.04 g of  $\text{K}_2\text{HPO}_4 \cdot 2\text{H}_2\text{O}$ ; 0.075 g of  $\text{MgSO}_4 \cdot 7\text{H}_2\text{O}$ ;  
95 0.036 g of  $\text{CaCl}_2 \cdot 2\text{H}_2\text{O}$ ; 6 mg of citric acid combined with 6 mg of ferric citrate; 0.001 g of  $\text{Na}_2\text{EDTA} \cdot 2\text{H}_2\text{O}$  and 0.02 g of  $\text{Na}_2\text{CO}_3$ . Trace metal solutions contained  
96 (per liter) 2.86 mg of  $\text{H}_3\text{BO}_3$ ; 1.81 mg of  $\text{MnCl}_2 \cdot 4\text{H}_2\text{O}$ ; 0.222 mg of  $\text{ZnSO}_4 \cdot 7\text{H}_2\text{O}$ ; 0.39 mg of  $\text{Na}_2\text{MoO}_4 \cdot 2\text{H}_2\text{O}$ ; 0.079 mg of  $\text{CuSO}_4 \cdot 5\text{H}_2\text{O}$  and 0.0494 mg of

97 Co(NO<sub>3</sub>)<sub>2</sub>·6H<sub>2</sub>O. Cultures were incubated at room temperature (21°C±2), in a light/dark cycle of 12h/12h under 36.8 μE m<sup>-2</sup> s<sup>-1</sup> of photon irradiance while shaken at  
98 200 rpm in a Cimarec i Multipoint Stirrer, 6 Position, 2000 rpm, 3L per Multipoint, 100-240 VAC rotary shaker.

## 99 **2.2 Experimental design of *Synechococcus*-bloom formation**

100 Two independent growth experiments were performed in 1L glass serum bottles containing 800 mL of 1/3 BG-11 medium adjusted to pH 7.5, sealed with silicone caps  
101 to allow gas exchange. Cells used for the inoculum (pH = 9.2) were pre-cultured in a full-strength BG-11. Immediately after inoculation (30 mL/bottle), the pH  
102 increased to approximately 8.2.

### 103 **2.2.1 Experiment I**

104 In the first growth experiment, six bottles were inoculated with *Synechococcus* PCC7942. Cell growth and EPS production were examined. Optical density (OD<sub>750nm</sub>),  
105 pH and cell counts were monitored weekly (2-3 times by week). EPS was extracted on days 14, 28 and 56 of cultivation (two bottles were harvested at each sampling  
106 time).

### 107 **2.2.2 Experiment II**

108 The second growth experiment was performed in quadruplicate. Chlorophyll *a* (Chl*a*), extracellular carbonic anhydrase activity (eCA), nutrients (NO<sub>3</sub><sup>-</sup> and PO<sub>4</sub><sup>3-</sup>) and  
109 calcium concentration were analysed at 0, 14, 28 and 56 days of cultivation. pH values, OD and cell counts were also assessed at longer intervals (once per week) than  
110 in Experiment I.

## 111 **2.3 Growth assessment**

### 112 **2.3.1 pH values, optical density (OD) and cell counts**

113 The pH value was measured about 3-4 h after the light cycle started with a CRISON GLP 21 pH meter (Crison Instruments SA, Alella, Spain). Cell growth was  
114 monitored through cell counts and OD<sub>750</sub> measurements. Cell counts were performed using a counting chamber (Neubauer, Mariangela, Germany) by randomly  
115 selecting five fields of view and counting approximately 100-200 cells. The OD at 750 nm of a 1-ml sample of the culture was measured in a Bio-Rad SmartSpec Plus  
116 Spectrophotometer (Bio-Rad, Hercules, CA, USA).

### 117 **2.3.2 Chlorophyll-a extraction**

118 Chl*a* was extracted from 2 ml culture aliquots using a methanol extraction method (Stal et al., 1984). Following the extraction in the dark at 4 °C, samples were  
119 centrifuged. The Chl*a* absorbance was measured in the supernatant at 665 nm using a Bio-Rad SmartSpec Plus Spectrophotometer (Bio-Rad, Hercules, CA, USA).

### 120 **2.3.3 Extracellular carbonic anhydrase activity**

121 The extracellular carbonic anhydrase (eCA) activity was measured using a BioVision Carbonic Anhydrase Activity Assay Kit Kit (BioVision, Ref. K472-100, Abcam,  
122 Waltham, MA, USA) according to the manufacturer's specifications. Aliquots of ~ 5 ml were analysed immediately after the collection. To avoid cell lysis and  
123 intracellular CA contamination, samples were not centrifuged. The cells were separated from the supernatant by using a 1 mL syringe and a 0.20 μm NALGENE®  
124 syringe filter. The absorbance was measured in a Bio-Rad Model 680 Microplate Reader at 405 nm.

### 125 **2.3.4 Nitrogen, phosphorus and calcium measurements**

126 Phosphate, nitrate and calcium concentrations were determined in the growth medium at 0, 14, 28 and 56 days of cultivation. Cells were removed by centrifugation  
127 and filtration through a 0.20 μm Millipore filter under a mild vacuum. The samples were stored at 4°C in the dark until measured by ion chromatography. Analyses  
128 were realized within the PEA<sup>2</sup>t technical platform of the Chrono-Environment Laboratory UMR6249 (Université de Franche-Comté, Besançon, France) and the Ca<sup>2+</sup>  
129 concentration was determined by ICP-AES (dual axial and radial view iCAP Pro XP model with fast loop, Thermofisher Scientific, Courtaboeuf, France) available at  
130 the University of Franche-Comté, Besançon, France.

## 131 **2.4 EPS extraction and purification**

132 EPS were extracted from the *Synechococcus* cultures as previously described by Martinho de Brito et al. (2022). EPS were harvested after 14, 28 and 56 days of  
133 cultivation. Cyanobacterial cells were inspected by microscopy to ensure that no cell lysis had occurred during the extraction process. The pure EPS fractions were  
134 obtained by ultrafiltration (>10 kDa = retentate) for volume reduction and the weight of the material was determined following by dialysis (using a 1 kDa Membrane)  
135 lyophilization on a high-precision analytical balance (Quintix 35-1S, Sartorius, Gottingen, Germany).

## 136 **2.5 EPS characterization**

### 137 **2.5.1 Fourier Transform-Infrared Spectroscopy**

138 FT-IR spectra were obtained from freeze-dried EPS on an FT-IR Bruker Alpha spectrometer (Bruker Optics SARL, Marne la Vallée, France) fitted with an Attenuated  
139 Total Reflectance (ATR) ALPHA-P device equipped with a mono-reflection diamond crystal. A total of 24 scans were performed on each sample at a spectral  
140 resolution of 4 cm<sup>-1</sup> in the 4000–375 cm<sup>-1</sup> wavenumber range. The qualitative assignment of absorption bands was performed by comparison with spectra available in  
141 the literature (Coates, 2000).

### 142 **2.5.2 Protein, sugar and glycosaminoglycan [quantification]**

143 The total protein content of EPS was determined using the Bicinchoninic acid assay (Pierce® BCA Protein Assay Kit) and bovine serum albumin as the standard. The  
144 total sugar content was determined by a modified phenol-sulfuric acid method (Dubois et al., 1956) and xanthan and dextran were used as standards (Sigma-Aldrich,  
145 St. Louis, MO, USA). The total glycosaminoglycan (GAGs) content was quantified using the Blyscan Assay according to the manufacturer's protocol (Blyscan Kit  
146 B1000, Biocolor Ltd., Antrim, UK) with chondroitin sulphate as the standard. All assays were carried out in duplicated EPS samples.

### 147 **2.5.3 Visualization of polyanionic macromolecules on Alcian Blue stained gels**

148 Sodium Dodecyl Sulfate-Polyacrylamide Gel Electrophoresis (SDS-PAGE) followed by Alcian Blue staining (Wall and Gyi, 1988) were used to separate and to stain  
149 negatively charged macromolecules (10- > 170 kDa), respectively. Alcian Blue is a dye that specifically binds to glycoconjugates with an acidic character (*e.g.*,  
150 containing carboxylated or sulfated functional groups). Samples were analysed on one-dimensional precast gradient protein gels (TGX Gel 4-15%, 90 mm x 70 mm)  
151 on a Mini-Protean 3 cell (Bio-Rad, Hercules, CA, USA), according to the method previously described by Martinho de Brito et al. (Martinho de Brito et al., 2022).  
152 Prior to migration, samples were heat-denatured in standard 2x Laemmli sample buffer (5 min., 99°C, ref. 1610737, Bio-Rad). A pre-stained protein ladder  
153 (Euromedex, #06P-0111; MW: 10 kDa to > 170 kDa) was used as a reference.

### 154 **2.5.4 Inhibitory effect of EPS using pH-drift assay**

155 The capacity of negatively charged functional groups in EPS to inhibit the *in vitro* precipitation of calcium carbonate was tested with the pH-drift assay (Wheeler et  
156 al., 1981; Marin et al., 2000; Kawaguchi and Decho, 2002). This assay was performed as previously described by Martinho de Brito et al. (2022). Briefly, the pH was  
157 recorded by a pH meter (Laboratory Research Grade Benchtop pH/mV Meter with 0.001 pH Resolution-HI5221) connected to a PC via a USB cable. Data were  
158 recorded by the HANNA HI92000 software. The pH was measured every two seconds for ~15 min. The shape of the curve (after reaching its maximum, about one  
159 minute after T<sub>0</sub>) reflects directly the inhibitory capacity of the tested EPS: a fast decrease in pH (decreasing exponential) indicates ongoing precipitation i.e. the  
160 absence of inhibition. A delayed decrease in pH, resulting in a plateau around pH 8, indicates an inhibitory effect, proportional to the length of the plateau. Between  
161 each experiment, the electrode was refreshed with dilute acid and blank tests (without EPS) were performed.

### 164 **2.6 Interaction of EPS with the *in vitro* precipitation of CaCO<sub>3</sub>**

165 The potential of the EPS matrix to interact with the precipitation of calcium carbonate was tested via the diffusion method in the presence of a closed ammonia-CO<sub>2</sub>  
166 saturated atmosphere (Albeck et al., 1993). 200 µL of the mixture containing pre-filtered (0.22 µm) CaCl<sub>2</sub> solution (10 mM) and EPS at increasing concentrations (3,  
167 18, and 36 µg.mL<sup>-1</sup>) were incubated in duplicate in 16-well plates (Lab-Tek, Nunc/Thermo Scientific, Rochester, NY, USA). The EPS concentrations were selected  
168 to match the EPS yields at the extraction times (14, 28 and 56 days of cultivation). The plastic covers of the well plates were perforated to allow the reaction between  
169 CaCl<sub>2</sub> solutions containing EPS and ammonium bicarbonate. The well plates were placed in a desiccator that was incubated at 4°C in the dark for 72 hrs. At the  
170 completion of the incubation period, the pH value was measured in each well, the overlying solutions were carefully removed to dryness and CaCO<sub>3</sub> crystals analysed.  
171 Blank experiments were performed without any EPS. The experiment was carried out in duplicates.

#### 172 **2.6.1 Morphology and mineralogy of the crystals**

173 The 16-well plates containing crystals were used in two manners: first, the morphology of the CaCO<sub>3</sub> crystals was checked with a tabletop scanning electron microscope  
174 (Hitachi TM 1000, Ibariki, Japan) in back-scattered electron mode. To this end, the glass plate base was unsealed from its plastic well part and directly observed  
175 without carbon or gold sputtering. Secondly, the polymorph of the calcium carbonate minerals was determined by FT-IR spectroscopy using an FT-IR Bruker Alpha  
176 (Bruker Optics, SARRL, Champs-sur-Marne, France). Mineral phases were determined by comparison of the spectra with the reference spectra available in the RRUFF  
177 Project database (<https://rruff.info>, accessed on January 1<sup>st</sup>, 2022).

#### 178 **2.6.2 Crystal counts and size distribution**

179 CaCO<sub>3</sub> crystals were counted directly in the 16-well plates using an inverted microscope (Nachet, Paris, France) equipped with Mosaic 2.2.1 image analysis software.  
180 Images were processed to obtain crystal sizes (average width and length of size classes < 50 µm and > 50 µm) and the total count of crystals in each well. A total of  
181 ten fields of view (10 squares) accounting for 15.5 mm<sup>2</sup> were analysed. The results are reported as the mean ± standard deviation.

### 182 **2.7 Statistical analysis**

183 All the data concerning *Synechococcus* growth and EPS production are representative of two independent experiments with two technical replicates (four replicates  
184 for EPS extracted at 56 days of culture). The results are reported as the mean ± standard error of the mean. Statistical significance was assessed by performing single-  
185 factor ANOVA tests; p-values < 0.05 were statistically different.

## 186 **3. Results**

### 187 **3.1 Trends in *Synechococcus* PCC7942 growth experiments and pH evolution**

188 Cell density and pH values increased over the *Synechococcus* cultivation period (Figure 1A and 1B). The growth of *Synechococcus* cells showed a typical pattern  
189 including a brief lag phase (~6-7 days) followed by a 7-day (experiment I) and 14-day (experiment II) exponential phase and finally a stationary phase. The stationary  
190 phase (early stationary phase) was reached after 14 and 21 days of growth in experiment I and II, respectively, and lasted until day 56 of cultivation in both experiments  
191 (late stationary phase) (Figure 1A). Growth experiments I and II started with a similar cell density of approximately 10<sup>10</sup> cells.L<sup>-1</sup> and demonstrated reproducible  
192 growth patterns (p-value = 0.91). At the time of inoculation, cell density was 9.5 × 10<sup>10</sup> in experiment I and 7.1 × 10<sup>10</sup> cells.L<sup>-1</sup> in experiment II (Figure 1A).  
193 *Synechococcus* grew exponentially until reaching a maximum of 1.7 × 10<sup>12</sup> in experiment I at 14-day of growth and 1.5 × 10<sup>12</sup> cells.L<sup>-1</sup> after 21 days of growth in  
194 experiment II. At the end of the exponential growth phase, the cell numbers levelled off and achieved a stable growth stage (stationary phase). Typical evolutions of  
195 pH values in culture media during the *Synechococcus* growth experiments are presented in Figure 1B. As a general trend, pH is linked to the photosynthetic activity  
196 of cyanobacteria. The pH levels rose rapidly during the exponential phase in both experiments, reaching around 10, and stayed steady during the stationary phase.  
197 While experiment I experienced significant pH fluctuations during the latter part of the stationary phase, overall, the pH evolution trends for both experiments are  
198 comparable (p-value = 0.91; Figure 1B). The p-values for pH and cell numbers showed that the two independent growth experiments are not significantly different.

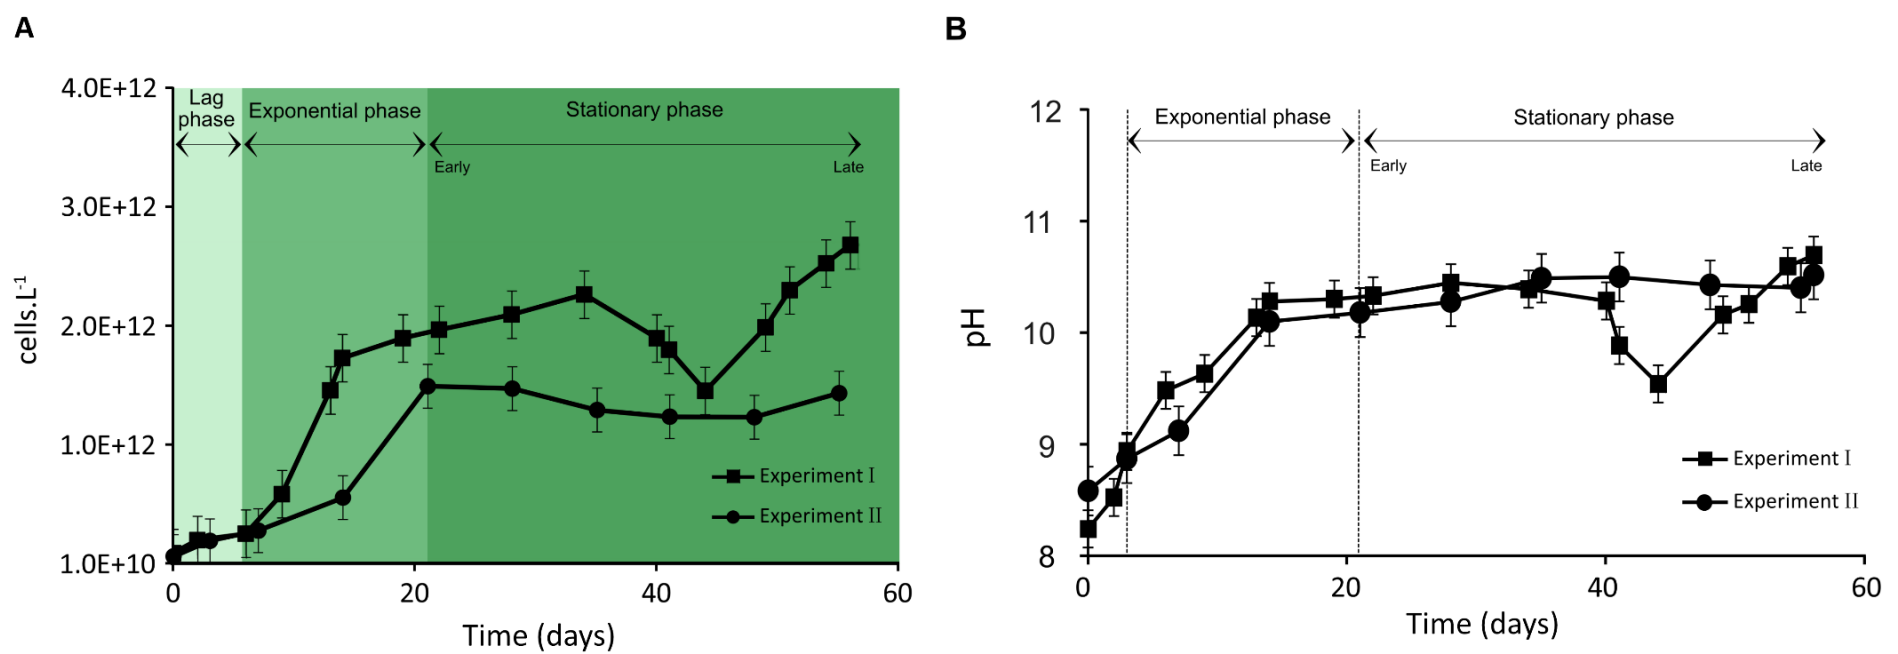

199 **Figure 1.** Evolution of biomass of *Synechococcus* PCC 7942 culture (A) and pH evolution (B) during exponential, early and late stationary phases. The vertical dotted lines (B)  
200 represent the stage transition between lag, exponential and stationary phases. Each value is the mean  $\pm$  SD of all replicate values.  
201

### 202 3.2 Extracellular carbonic anhydrase

203 The activity of extracellular carbonic anhydrase (eCA) in solution changed slightly over the growth experiment (Figure 1S). The highest eCA activity (~1600) was  
204 detected after 14 days of culture, during the exponential phase. The lowest activity was measured after 56 days of growth, in the late stationary phase.

### 205 3.3 Nutrient concentrations during growth

206 High nitrate concentrations supported exponential growth and high cell density (Table 1). The results show that a major decrease in nitrate and phosphate  
207 concentrations occurred during the exponential growth phase and remained slowed down progressively over the stationary phase. At the end of the stationary phase,  
208 the phosphate concentration had decreased to approximately 30% of its initial level. On the other hand, the nitrate concentration was still high, with approximately  
209 67% of its initial concentration remaining. Ammonium concentration was below the limit of detection (2.2  $\mu$ M). Calcium concentrations decreased gradually and  
210 accounted for the total calcium concentration of 81% in the late stationary phase. Other medium constituents should be present in excess and were thus not measured.  
211

212 **Table 1.** Concentrations of  $\text{NO}_3^-$ ,  $\text{PO}_4^{3-}$  and  $\text{Ca}^{2+}$  ( $\mu$ M) in the culture medium before inoculation (initial concentrations in the medium) and during exponential, early and late stationary  
213 of *Synechococcus* growth phases are given as mean concentrations of four replicates (n=4).

| Major anions and cations<br>( $\mu$ M) | Initial concentrations<br>in the medium | <i>Synechococcus</i> growth phases |                  |                  |
|----------------------------------------|-----------------------------------------|------------------------------------|------------------|------------------|
|                                        |                                         | Exponential                        | Early stationary | Late stationary  |
| $\text{NO}_3^-$                        | 7082 $\pm$ 58.7                         | 5731 $\pm$ 328.9                   | 5544 $\pm$ 57.9  | 4716 $\pm$ 250.1 |
| $\text{PO}_4^{3-}$                     | 68 $\pm$ 0.6                            | 39 $\pm$ 4.7                       | 41 $\pm$ 2.2     | 21 $\pm$ 6.7     |
| $\text{Ca}^{2+}$                       | 102 $\pm$ 0.5                           | 91 $\pm$ 2.1                       | 88 $\pm$ 1.7     | 83 $\pm$ 4.8     |

### 214 215 3.3 Abundance of EPS

216 The recovery yields of the EPS produced (mean  $\pm$  SD) resulting from the applied extraction method are listed in Table 2. The EPS yields varied from 2.9 $\pm$ 0.5 to  
217 18.6 $\pm$ 2.1 mg.L<sup>-1</sup> during exponential and early stationary phases and reached the highest yield of 35.4 $\pm$ 4.2 mg.L<sup>-1</sup> at 56 days of culture, in the late stationary phase  
218 (Table 2). When the values were normalized per cell yield, results showed that the EPS concentration increased significantly between the exponential and late stationary  
219 phases (p-value < 0.05) (Figure 2). *Synechococcus* continuously produced EPS during the 56-day experiment. In the first 14 days of growth, cells grew exponentially  
220 and EPS production was deficient. Between exponential and early stationary phases, EPS production increased by a factor of five to seven, reaching a maximum in  
221 the late stationary phase, after the 56-day growth experiment.  
222

223 **Table 2.** Cell yield, total EPS production and cell-specific EPS production in *Synechococcus* PCC7942 cultures during exponential, early and late stationary growth phases. Data  
224 represent the means of two independent experiments.

|                                                         | Time of harvest (growth phase)     |                                   |                                    |
|---------------------------------------------------------|------------------------------------|-----------------------------------|------------------------------------|
|                                                         | Exponential                        | Early stationary                  | Late stationary                    |
| Cell yield (cells.L <sup>-1</sup> )                     | (161.6 $\pm$ 21.6)10 <sup>10</sup> | (211.2 $\pm$ 6.0)10 <sup>10</sup> | (268.8 $\pm$ 14.4)10 <sup>10</sup> |
| EPS yield (mg.L <sup>-1</sup> )                         | 2.9 $\pm$ 0.5                      | 18.6 $\pm$ 2.1                    | 35.4 $\pm$ 4.2                     |
| Cell-specific EPS production (mg. cells <sup>-1</sup> ) | (1.9 $\pm$ 0.6)10 <sup>-12</sup>   | (8.8 $\pm$ 0.8)10 <sup>-12</sup>  | (13.1 $\pm$ 0.9)10 <sup>-12</sup>  |

225  
226



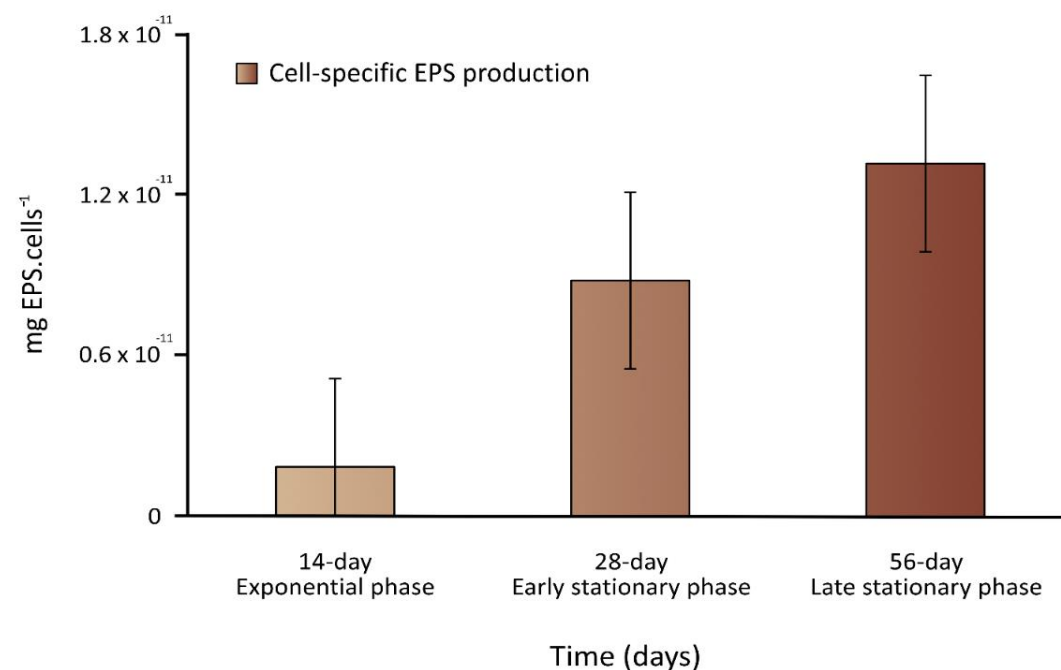

227  
228  
229

**Figure 2.** Cell-specific EPS production during the exponential, early and late stationary phases. MEAN±SD replicates from (n=2).

### 230 3.4 Chemical properties of EPS

#### 231 3.4.1 FT-IR spectroscopy of EPS

232 FT-IR spectroscopy was used to check the overall EPS properties and composition. The IR spectra of EPS harvested during the exponential, early and late stationary  
233 phases of the growth experiment are depicted in Figure 3. The three spectra show strong similarities, exhibiting characteristic absorption bands for polysaccharides  
234 and protein moieties (highlighted in Figure 3 by vertical-coloured areas). However, differences in sample composition were also revealed by the presence of additional  
235 absorptions indicated by arrows in Figure 3. Interestingly, the spectrum of the exponential phase EPS exhibits a strong band, isolated at 582 cm<sup>-1</sup>, which according to  
236 the literature on EPS could be assigned to a C–X stretch of alkyl halides (Kavita et al., 2011). Bands at 811–868 cm<sup>-1</sup>, most likely representing the glycosidic linkage  
237 between sugar monomers, were only present in EPS extracts in the early and late stationary phases. Bands at 1039 – 1128 cm<sup>-1</sup> (C–O and C–O–C stretching vibrations)  
238 could be assigned to polysaccharides and polysaccharide-like structures (Wang et al., 2012) and were observed in all EPS samples (Figure 3, blue area). In contrast,  
239 the small shoulders observed in the early and late stationary phase EPS, at ~1242 and 1244 cm<sup>-1</sup> correspond to sulfate groups (νS=O stretching vibrations). Low-  
240 intensity bands observed in the range of 1370–1450 cm<sup>-1</sup> are assigned to CH<sub>3</sub> and CH<sub>2</sub> deformations (bends) of proteins (Kansiz et al., 1999). These absorption bands  
241 were more evident in EPS obtained during the early stationary phase. The bands present in the range of 1660 and 1540 cm<sup>-1</sup> are attributed to C=O and C–N stretching  
242 vibrations and are characteristic of Amide I and II functions (Figure 3, orange and green areas, respectively), which are typically associated with proteins (Coates,  
243 2000). Spectra of the early stationary phase EPS showed higher peaks of protein than those observed in EPS from exponential and late stationary phases. The medium  
244 bands at 1730 and 1727 cm<sup>-1</sup>, present in samples extracted from exponential and late stationary phases, can be attributed to C=O stretching vibrations resulting from  
245 lipids and fatty acids (Kansiz et al., 1999). Absorptions in the range of 2960–2850 cm<sup>-1</sup> corresponding to C–H stretching vibrations of aliphatic hydrocarbons and  
246 possibly indicative of long-chain polymers (e.g., sugars or proteins), were observable in all EPS extracts. The amide A band (3345 cm<sup>-1</sup>), characteristic of the N–H  
247 vibration of peptide groups in proteins, is present in all spectra (Figure 3, yellow area), but is particularly visible on the early stationary phase EPS spectrum. In the  
248 samples at 14 and 56 days of growth, this band is included in shoulders due to the presence of OH absorptions centred at 3342 and 3351 cm<sup>-1</sup>, respectively. The list  
249 of band assignments is summarized in supplementary material (Table 1S).

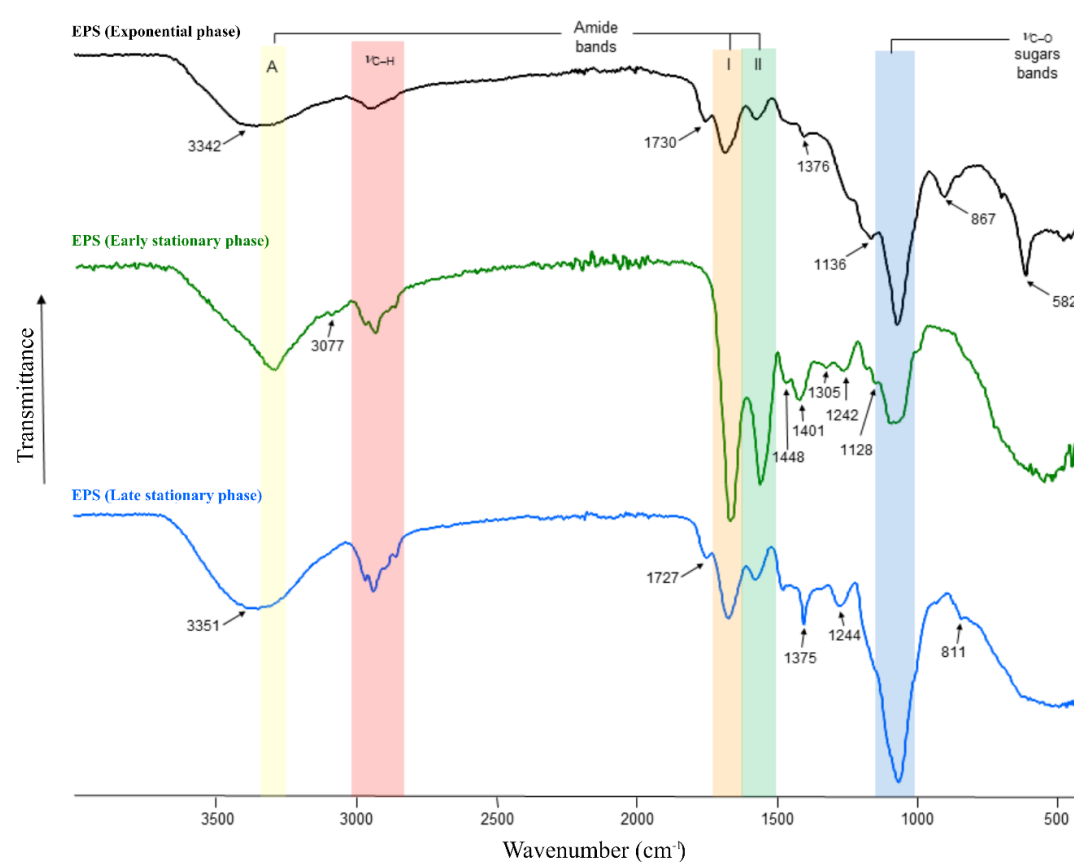

250  
251  
252  
253

**Figure 3.** FT-IR spectra of EPS produced during the exponential (black line), early (green line) and late (blue line) stationary phases. Amide A absorbs in the range of 3342–3351  
cm<sup>-1</sup> (yellow area), amides I-II at 1542–1650 cm<sup>-1</sup> (orange and green areas), sulfate groups at ~1242–1244 cm<sup>-1</sup>, polysaccharides at ~1040–1070 cm<sup>-1</sup> (blue area), and the β-glycosidic  
linkages are visible as a shoulder at ~867cm<sup>-1</sup>.

### 254 3.4.2 Protein, sugar and glycosaminoglycan (GAGs) contents

255 The EPS produced during the exponential growth phase revealed the lowest concentration of protein ( $79\pm 9 \mu\text{g}\cdot\text{mg}^{-1}$  EPS) (Table 3). The highest protein concentration  
 256 was measured in EPS produced during the early stationary phase ( $253\pm 42 \mu\text{g}\cdot\text{mg}^{-1}$  EPS), whereas during the late stationary phase EPS, the protein concentration  
 257 decreased by ~ two-fold. When accounting for the cell yield at times of EPS extraction, cells produced EPS with *ca* 11-15 times more protein in the stationary phase  
 258 than in the exponential phase. The sugar content in the EPS harvested during the three different growth stages did not vary significantly. The EPS produced during the  
 259 exponential phase contained a slightly higher sugar content ( $584\pm 9 \mu\text{g}$  of xanthan and  $504\pm 78 \mu\text{g}$  of dextran equivalents.  $\text{mg}^{-1}$  EPS) than that measured in EPS  
 260 produced during the early and late stationary phases (1.8 times and 1.3 times lower, respectively). Our results show that, over the cultivation time, cells enhanced the  
 261 production of larger amounts of glycosaminoglycans (GAGs) which can be associated with amino sugars and glycoproteins. The highest fraction of sulfated groups  
 262 (GAGs) to total EPS ( $217\pm 143 \mu\text{g}$  GAGs. $\text{mg}^{-1}$  EPS) was found in the late stationary phase EPS.

264 **Table 3.** Protein, sugar and glycosaminoglycan content of the harvested EPS at times 14, 28 and 56 days of *Synechococcus* PCC7942 culture. Values represent the average of four,  
 265 three and two measurements of protein, sugar and GAGs, respectively, in two EPS replicated samples (n=2).

| Components of EPS yield                                                                 | Time of EPS harvesting (days/growth phase) |                               |                              |
|-----------------------------------------------------------------------------------------|--------------------------------------------|-------------------------------|------------------------------|
|                                                                                         | 14 days<br>Exponential                     | 28 days<br>Early stationary   | 56 days<br>Late stationary   |
| Protein ( $\mu\text{g}\cdot\text{mg}^{-1}$ EPS)                                         | $79\pm 9$                                  | $253\pm 42$                   | $128\pm 13$                  |
| Cell-specific protein production ( $\mu\text{g}$ protein. $\text{cell}^{-1}$ )          | $(1.5\pm 0.6)\times 10^{-10}$              | $(2.2\pm 0.1)\times 10^{-9}$  | $(1.7\pm 0.0)\times 10^{-9}$ |
| Sugar ( $\mu\text{g}$ xanthan equivalents. $\text{mg}^{-1}$ EPS)                        | $584\pm 95$                                | $326\pm 26$                   | $434\pm 11$                  |
| Cell-specific sugar production ( $\mu\text{g}$ xanthan equivalent. $\text{cell}^{-1}$ ) | $(1.0\pm 0.2)\times 10^{-9}$               | $(2.8\pm 0.1)\times 10^{-9}$  | $(5.7\pm 0.2)\times 10^{-9}$ |
| Sugar ( $\mu\text{g}$ dextran equivalents. $\text{mg}^{-1}$ EPS)                        | $504\pm 78$                                | $292\pm 22$                   | $381\pm 90$                  |
| Cell-specific sugar production ( $\mu\text{g}$ dextran equivalent. $\text{cell}^{-1}$ ) | $(8.9\pm 1.4)\times 10^{-10}$              | $(2.6\pm 0.1)\times 10^{-9}$  | $(5.0\pm 0.2)\times 10^{-9}$ |
| Glycosaminoglycans ( $\mu\text{g}$ GAGs. $\text{mg}^{-1}$ EPS)                          | $4\pm 0$                                   | $31\pm 13$                    | $217\pm 143$                 |
| Cell-specific GAGs production ( $\mu\text{g}$ GAGs. $\text{cell}^{-1}$ )                | $(5.5\pm 5.5)\times 10^{-12}$              | $(2.6\pm 0.8)\times 10^{-10}$ | $(3.0\pm 2.0)\times 10^{-9}$ |
| GAGs/Sugar (xanthan) ratio                                                              | $0.01\pm 00$                               | $0.09\pm 00$                  | $0.51\pm 0.3$                |
| GAGs/Sugar (xanthan) ratio                                                              | $0.01\pm 00$                               | $0.10\pm 00$                  | $0.58\pm 0.4$                |

### 267 3.4.3 SDS-PAGE

268 The results of gel electrophoresis after the migration of exponential, early and late stationary phase EPS samples are illustrated in Figure 4. Replicates showed similar  
 269 band patterns that are distributed between 10 and > 170 kDa. A sharp greenish band in the migration front is strongly stained in late stationary phase EPS (Figure 4)  
 270 and may correspond to chlorophyll. A less pronounced smear is visible in extracts obtained from the early stationary phase (Lanes 4 and 5). Bands of < 10 kDa were  
 271 not detected in the EPS produced during the exponential phase (Lanes 2 and 3). A marked smear pattern is evidenced in all EPS extracted between 10-26 kDa: one  
 272 prominent band was individualized at 17 kDa. A discrete blue smear (> 17-43 or 55 kDa) is evidenced in exponential phase EPS samples (Lanes 2 and 3) and is less  
 273 obvious in EPS samples from the early and late stationary phase (lanes 4-5 and 6-7, respectively). No specific bands were individualized in the > 17-43 kDa molecular  
 274 mass range, for the three growth phases. A band at about 45-47 kDa was strongly stained in exponential phase only. An area between 43 and 170 kDa was noted in all  
 275 EPS extracts, accounting for 5-6 individualized bands that may correspond to the consecutive addition of an identical 'module', because the progression is logarithmic:  
 276 is clearly seen in the early and late stationary phase lanes (lanes 4-7). The individualized bands were densely stained in EPS from the late stationary phase, including  
 277 a smear at ~43-55 or 72 kDa (Lanes 6 and 7) and a prominent band at > 170 kDa (Lanes 6 and 7).

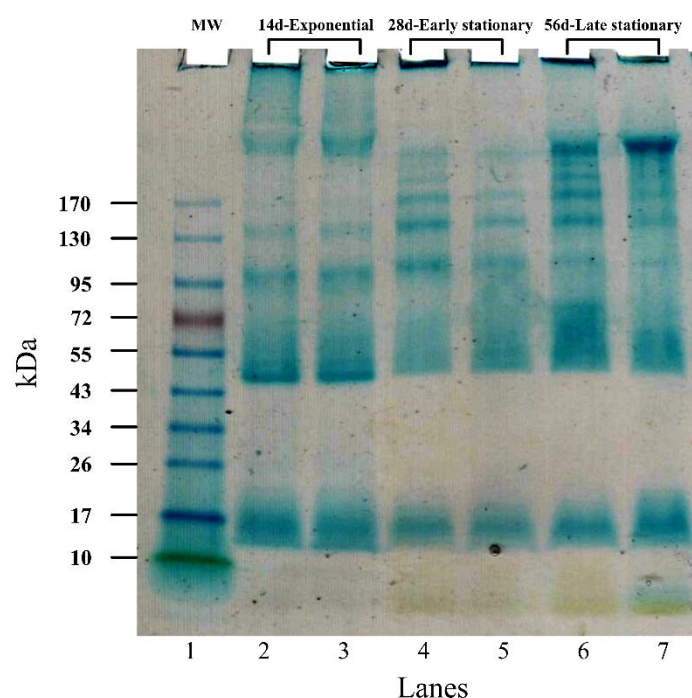

279 **Figure 4.** SDS-PAGE of EPS harvested during exponential (lanes 2-3), early (lanes 4-5) and late (lanes 6-7) stationary phases. Alcian blue staining was applied. The molecular ladder  
 280 (MW) reference is shown in lane 1.  
 281

### 282 3.4.4 pH-drift assay

283 Recordings of the pH-drift assay are shown in Figure 5. The pH-drift assay determined the inhibitory effect of the EPS matrix (e.g., negatively charged functional  
 284 groups) on the rate of  $\text{CaCO}_3$  precipitation. Negatively charged groups of EPS can bind calcium ions from the solution and inhibit the nucleation of carbonates. When

285 CaCO<sub>3</sub> minerals start to nucleate, the pH of the solution decreases. Results show that the inhibitory effect was concentration-dependent and clear differences were  
 286 visible between EPS extracted in the exponential (Figure 5A), early (Figure 5B) and late (Figure 5C) growth phases. EPS matrices from the stationary phase of culture  
 287 growth (Figures 5B and 5C) exhibited a stronger inhibitory effect on CaCO<sub>3</sub> precipitation than the EPS extracted during the exponential phase (Figure 5A). Complete  
 288 inhibition was only reached in EPS from early and late stationary phases when 50 µg of EPS.mL<sup>-1</sup> was tested. In this case, a drop in pH was not observed and nucleation  
 289 of crystals did not occur (Figure 5B and 5C), which means that the inhibition was total. Conversely, the exponential phase EPS exhibited less inhibition of CaCO<sub>3</sub>  
 290 precipitation (Figure 5A). The shorter plateau shows that the mineral-binding capacity of the matrix delayed CaCO<sub>3</sub> precipitation but that consequently the pH dropped  
 291 and visible precipitates formed, showing a less powerful inhibitory effect of the EPS compared to stationary phases EPS matrices.

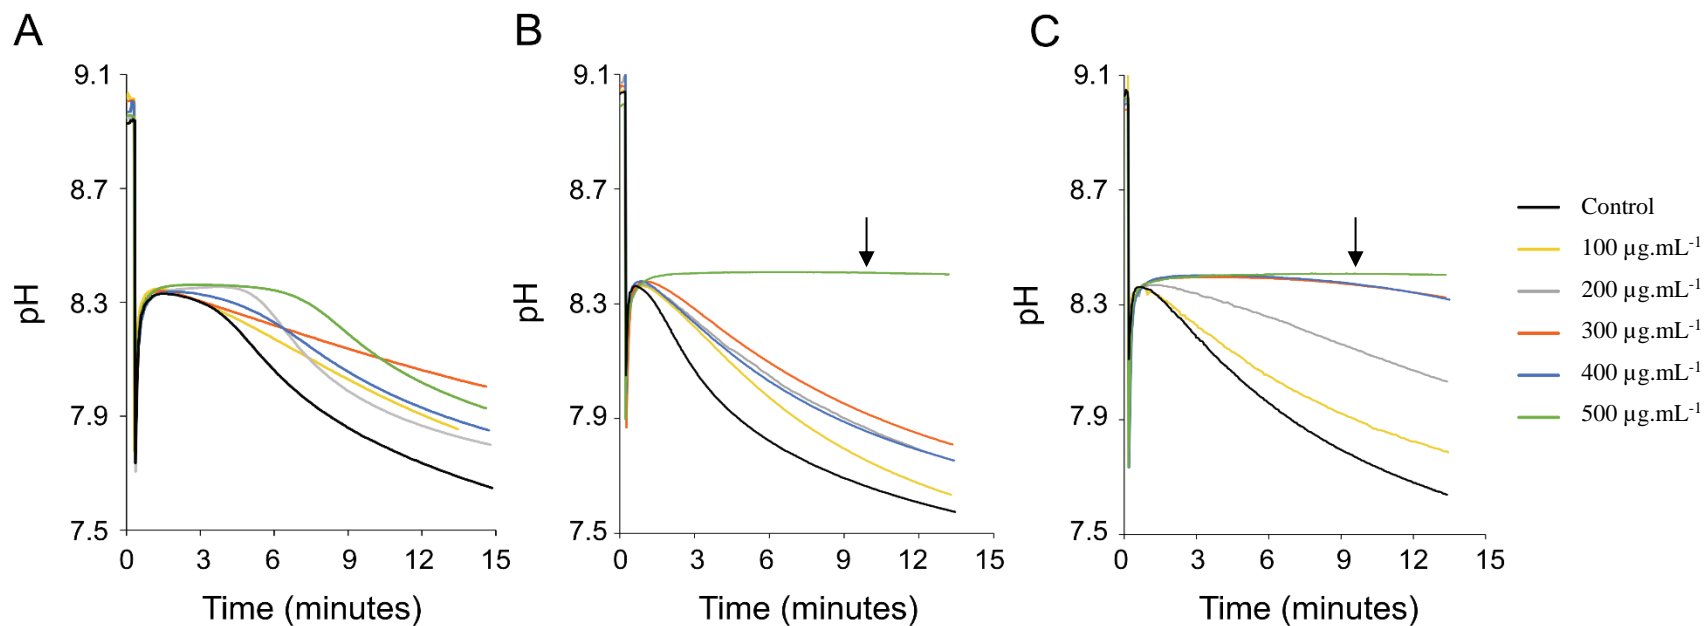

292  
 293 **Figure 5.** *In vitro* inhibition of calcium carbonate precipitation by using EPS extracted during exponential (A), early (B) and late (C) stationary phases. Each panel shows the effect of  
 294 six different EPS concentrations (0, 100, 200, 300, 400 and 500 µg EPS. mL<sup>-1</sup>) on CaCO<sub>3</sub> precipitation, using the pH-drift assay method. The drop in pH indicates nucleation of CaCO<sub>3</sub>  
 295 (= precipitation) and a plateau indicates inhibition of precipitation. A larger plateau indicates a higher Ca-binding capacity of the matrix and thus stronger inhibition. Complete  
 296 inhibition was observed when 50 µg of EPS solution from early and late stationary phases were used (*e.g.*, see arrows). The results in each panel represent single experiments.  
 297 Replication showed identical results (see Supplementary Figure 2S).  
 298

### 299 3.5 Calcium carbonate crystallization in the presence of EPS

300 Forced CaCO<sub>3</sub> experiments were performed using a control solution (without EPS) and EPS solutions, at same pH, with concentrations of 3, 18 and 36 µg.mL<sup>-1</sup>. Each  
 301 concentration corresponds to the EPS yield at different growth stages: exponential phase (= 3 µgEPS.mL<sup>-1</sup>), early (18 µgEPS.mL<sup>-1</sup>) and late (36 µgEPS.mL<sup>-1</sup>) stationary  
 302 phases. The crystals formed in the various EPS solutions showed different morphological (Figure 6) and mineralogical (Figure 3S) features as well as distinct crystal  
 303 sizes and distributions compared to those formed in control solution (Figure 7).

#### 304 3.5.1 Mineral morphology

305 A preliminary light microscopic analysis was carried out in order to identify the most significant samples to analyse by SEM (Figure 6). The morphology of crystals  
 306 precipitated in the negative controls was very homogeneous and predominantly composed of calcite rhombohedrons that sometimes formed polycrystalline aggregates  
 307 of size > 50µm (Figure 6A). All control solutions tested for the various EPS harvested during exponential and stationary phases showed similar crystal characteristics.  
 308 In the EPS solutions, CaCO<sub>3</sub> crystals showed both rhombohedral and spheroidal morphologies (Figure 6B-D). The morphology of crystals appears to change with  
 309 increasing EPS concentrations. Spherical minerals formation was observed in the exponential phase-EPS solution (Figure 6B) and were less frequent in the EPS  
 310 solution from early stationary phase (Figure6C). In the late stationary phase-EPS solution, rhombohedrons represented the prevalent crystal morphology while  
 311 spherical minerals were absent (Figure 6D).  
 312

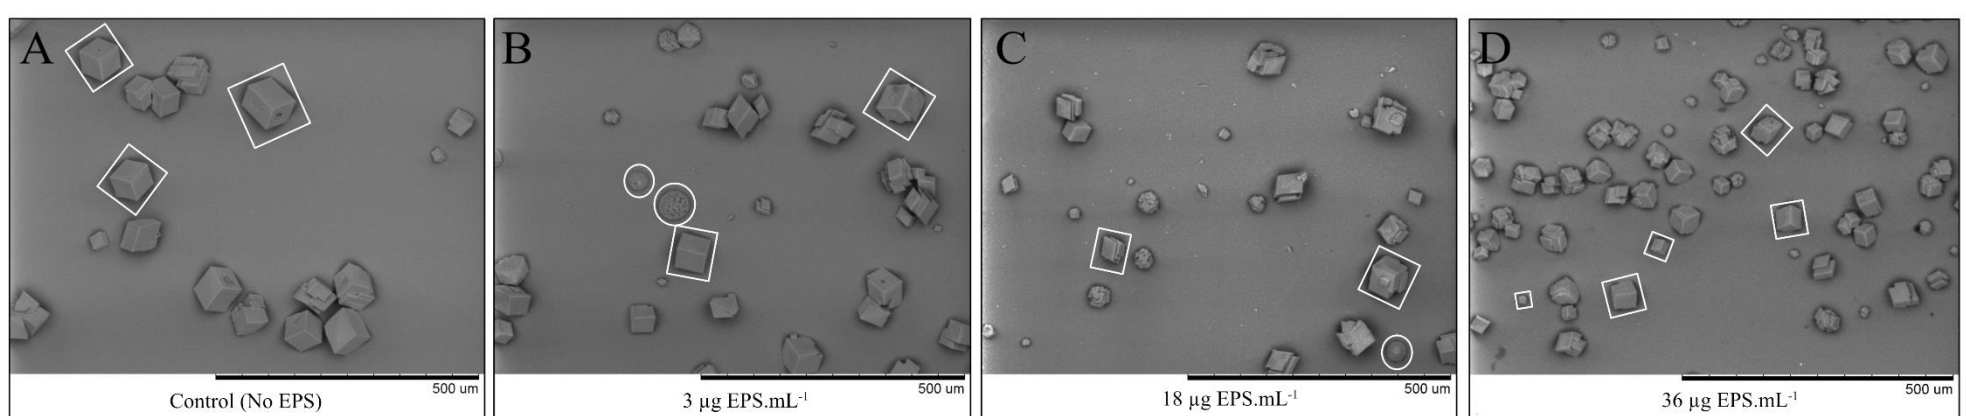

313  
 314 **Figure 6.** *In vitro* forced CaCO<sub>3</sub> precipitation assay in (A) the absence of the EPS (control solution) and in the presence of EPS extracted during the (B) exponential, (C) early and (D)  
 315 late stationary phases under increasing EPS concentrations of 3, 18 and 36 µg.mL<sup>-1</sup>, respectively. The images show two different CaCO<sub>3</sub> morphologies: rhombohedral (white squares)  
 316 and spheroidal (white circles), in some cases shown as polycrystalline crystals. The scale bar (black) at the bottom right of the images is 500 µm.

### 317 3.5.2 Crystal mineralogy

318 The crystals' mineralogy was assessed by FT-IR microscopy performed on selected individual crystals of  $> 10 \mu\text{m}$  (Figure 3S). The results revealed that calcite was  
319 the only  $\text{CaCO}_3$  polymorph formed in the control solution. Calcite and vaterite formed in all EPS solutions tested. The FT-IR spectra revealed that all rhombohedrons  
320 and polycrystalline aggregates with “sharp edges” represent calcite polymorphs. In contrast, spheroidal crystals revealed a vaterite signature (Figure 3S).

### 321 3.5.3 Crystal size and distribution

322 The results from image analysis showed that a larger quantity of crystals precipitated in the stationary phase (early and late) EPS solutions (Figure 7) and that major  
323 differences were also observed in crystal size distribution (Figure 7). A comparison of the class of small crystal sizes ( $< 50 \mu\text{m}$ ) with the large crystal size class  
324 ( $> 50 \mu\text{m}$ ) showed a clear trend of an increasing total number of small crystals in the stationary phase EPS solutions compared to those formed in the EPS solutions  
325 from the exponential phase. The size reduction of the crystals at 18 and 36 mg/L (Figure 7, early and late stationary phases) suggests a partial inhibitory effect of the  
326 EPS on the formation of calcium carbonate.

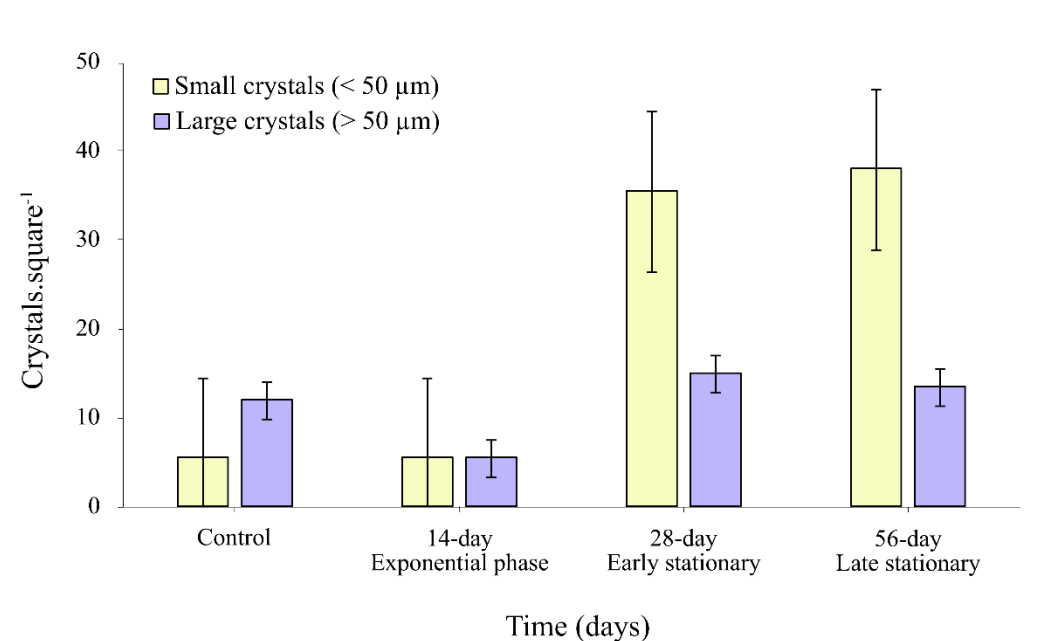

327  
328 **Figure 7.** Total numbers of small ( $< 50 \mu\text{m}$ ) and large ( $> 50 \mu\text{m}$ ) crystal size classes of precipitated  $\text{CaCO}_3$  in EPS solutions obtained from exponential and stationary phases, in EPS  
329 concentrations of 3, 18 and 36  $\mu\text{g}\cdot\text{mL}^{-1}$ , respectively.

## 330 4. Discussion

331 Our study demonstrates that the amount and properties of EPS change significantly ( $p\text{-value} < 0.05$ ) at the three different stages of *Synechococcus* growth in an  
332 artificial bloom experiment. Cells continuously produce EPS that increases in concentration and become more negatively charged in the stationary phase. We sampled  
333 this EPS over the exponential, early and late stationary phases and studied its role in carbonate mineral precipitation. Based on this, a conceptual model was developed  
334 to correlate the findings of this investigation with the potential EPS production of the naturally occurring picoplankton blooms and its possible involvement in whiting  
335 events. Though natural blooms experience a variety of factors that are not represented in the experiments described in this paper, the first part of the discussion is  
336 focussing only on the experimental data, whereas the interaction of these basic processes with other biotic and abiotic factors acting in the environment is discussed  
337 afterwards.

### 338 4.1 Exponential growth phase

339 Macronutrients, such as nitrogen (N) and phosphorus (P) promote the initiation of cyanobacterial blooms (Reynolds and Walsby, 1975; Paerl, 2008; Xu et al., 2015).  
340 In our growth experiment, the beginning of the exponential phase (and the persistence of bloom) (Figure 1A) was positively correlated with the high initial nutrient  
341 concentration in the medium (Table 1). Environmental factors such as water temperature, light intensity, hydrodynamics and availability of dissolved inorganic carbon  
342 (DIC) are also important determinants of cyanobacteria bloom development (Clark and Flynn, 2000; Dokulil and Teubner, 2000; Havens, 2008). Blooms can  
343 dramatically alter the supply of inorganic carbon for photosynthesis, which causes the pH to increase (Ibelings and Maberly, 1998). In the early exponential phase of  
344 our batch cultures, the high photosynthetic activity of cyanobacteria cultures resulted in fast pH increase thereby reducing the total inorganic carbon of the grown  
345 medium. Light and  $\text{CO}_2$  are the sources of energy and carbon for cyanobacteria, and are of critical importance for their growth (Takahashi et al., 2004). At pH 9  
346 (Figure 1B), the concentration of  $\text{CO}_2$  predicted is close to zero ( $< 1 \mu\text{M}$ ) and the  $\text{HCO}_3^-$  concentration is 475  $\mu\text{M}$  (PhreeqC data). A similar scenario was observed in  
347 natural blooms occurrence: the population of cyanobacteria draws down the partial pressure of  $\text{CO}_2$  ( $p\text{CO}_2$ ) in the photic zone, increasing the surface water pH up to  
348 9-10 (Ibelings and Maberly, 1998; Verspagen et al., 2014) and  $\text{CO}_2$  concentration can become completely depleted or reach values close to zero (Maberly, 1996).  
349 Under extreme conditions, the concentration of  $\text{HCO}_3^-$  can also become markedly reduced (Talling, 1976; Maberly, 1996). When the rate of photosynthesis is greater  
350 than the combined rate of resupply of  $\text{CO}_2$  from the atmosphere and DIC in the hypolimnion, deviation from the air equilibrium occurs, favouring  $\text{CaCO}_3$  precipitation.  
351 The pH of most aquatic systems ranges from 7.5-8.1 and keeps inorganic carbon primarily in the form of bicarbonate (O'Neil et al., 2012). In poorly buffered systems,  
352 such as highly productive lakes, the pH and speciation of DIC experience large fluctuations which vary widely on a scale from daily (diel) to episodic, to seasonal  
353 (Maberly, 1996) with diel variations as high as two pH units and 60  $\mu\text{mol DIC}\cdot\text{L}^{-1}$  (Maberly, 1996). Because  $\text{CO}_2$  favors the  $\text{C}_3$  photosynthesis ( $\text{C}_3$  cycle operation of  
354 Calvin-Benson cycle), the high pH of  $\sim 10$  in our growth medium could be associated with carbon limitation (Ibelings and Maberly, 1998; Verspagen et al., 2014).  
355

356 To alleviate CO<sub>2</sub> limitation, cyanobacteria have developed an efficient CO<sub>2</sub>-concentrating mechanism (CCM) (Aizawa and Miyachi, 1986; Badger and Price, 1992;  
357 Badger et al., 2002; Burnap et al., 2015) and can use bicarbonate as an inorganic carbon source for photosynthesis (Price et al., 1998; Giordano et al., 2005; Sandrini  
358 et al., 2016). By activating CCM, cyanobacteria concentrate CO<sub>2</sub> by a factor of up to a thousand (Badger and Andrews, 1982; Badger et al., 2002; Price, 2011). CO<sub>2</sub>-  
359 deficient conditions experienced during the exponential phase of our growth experiment, coupled with the continuous cellular demand for inorganic carbon to support  
360 photosynthetic carbon fixation likely led the cells to activate CCM. The predicted concentrations of CO<sub>2</sub> and HCO<sub>3</sub><sup>-</sup> in the growth medium (PhreeqC data) in the early  
361 and late exponential phase infer that *Synechococcus* cells actively transported across the membrane and accumulated DIC into the cell, where the HCO<sub>3</sub><sup>-</sup> pool was  
362 utilized to generate elevated CO<sub>2</sub> levels around Rubisco (Badger et al., 2002; Price et al., 2008). The CCM of cyanobacteria accomplishes very high carbon  
363 concentrating factors ( $C_{\text{external}} : C_{\text{internal}}$ ) at deficient specificity factors of RuBisCo (Tortell, 2000; Tortell et al., 2000). CCM involves bicarbonate transporters in the  
364 cell membrane, intracellular (iCA) and extracellular (eCA) carbonic anhydrase enzymes and concentrated RuBisCO activity located in carboxysomes (Badger et al.,  
365 2006; Price et al., 2008; Rae et al., 2013). CA converts HCO<sub>3</sub><sup>-</sup> to CO<sub>2</sub> (Badger and Price, 1994), which increases the external pH in close proximity to the cells. In our  
366 study, eCA activity was ~ 1.6-2.0 times higher during the exponential growth phase and reduced gradually through the stationary phase (Supplementary Figure 1S).  
367 The strongly stained band only present in the exponential phase-EPS at around 45-47 kDa (Figure 4, lanes 2, 3) may be indicative of eCA, as reported by Kupriyanova  
368 et al., 2018, but this requires further investigation. Another plausible explanation for the 45-47 kDa band could be the presence of chlorophyll f synthase, which  
369 typically migrates at around 46 kDa (Shen et al., 2019). Similarly, Yang et al. (2023) measured the CA anhydrase in solution over a 30-day growth experiment with  
370 *Synechococcus* PCC 7942 and reported an increase over the lag phase and large fluctuations over the exponential phase. During the stationary phase, CA did not vary  
371 greatly but a minor decrease was recorded in the late stationary phase (Yang et al., 2023). In our study, the higher eCA activity recorded could explain the strongly  
372 stained ~45-47-kDa band that was only identified in our SDS-PAGE gels of EPS produced during the exponential phase (Figure 4, lanes 2-3). The molecular weight  
373 (MW) of this band is similar to a 42-43 kDa eCA previously identified by Kupriyanova et al. (2018) and discussed by Martinho de Brito et al. (2022). As explained  
374 in the Results section 3.4.3, we cannot exclude that the band is chlorophyll f synthase, which seems to show up around 46 kDa. A more substantiated demonstration  
375 of the identity of the SDS-PAGE band will require other approaches (beyond the scope of the present study), such as micro-sequencing of the purified 43 kDa band  
376 or the use of a CA-specific antibody.

377

378 Active uptake of HCO<sub>3</sub><sup>-</sup> and accumulation of Ci species requires the input of metabolic energy e.g., ATP (BCT1 HCO<sub>3</sub><sup>-</sup> transporter), NADPH or reduced ferredoxin  
379 (CO<sub>2</sub> uptake) or coupling to an electrochemical Na<sup>+</sup> gradient (SbtA or BicA HCO<sub>3</sub><sup>-</sup> transport) (Badger et al., 2002; Price et al., 2008). This energetic cost may therefore  
380 reflect on the growth rates achieved. *Synechococcus* PCC 7942 grows at > 80% of its maximum growth rate when provided with HCO<sub>3</sub><sup>-</sup> as its main inorganic carbon  
381 source (Miller et al., 1984). During the exponential phase, the carbon production from photosynthesis is mainly allocated for biomass production, not for EPS synthesis.  
382 During this phase (Figure 2 and Table 2), the small amount of EPS produced comprises a higher proportion of sugars and lower amounts of protein and GAG compared  
383 to EPS produced during the stationary phase (Figure 3 and Table 3). Our study indicates that rather than proteins, sugars are the major component in all EPS extracts.  
384 This finding is supported by the data obtained from FTIR analysis (Figure 3). The smaller amount of negatively charged groups of the EPS during the exponential  
385 phase (Figure 4, lanes 2-3) compared to those of EPS from the early and late stationary phases (Figure 4, lanes 4-7) resulted in weak to moderate inhibitory capacity  
386 (Figure 5A). The main phenomenon observed in the pH-drift assay (Figure 5) is the initial Ca binding to negatively charged groups in EPS prior to carbonate addition,  
387 which initiates CaCO<sub>3</sub> precipitation. This results in a decrease of pH. The pH drift assay showed that EPS from exponential phase (Figure 5C) having a larger plateau,  
388 and thus a lower a calcium binding capacity than the EPS from the stationary phase. This observation was further corroborated by the forced precipitation experiments,  
389 which showed that EPS from the exponential phase induced small amount of mostly large-sized carbonate crystals (>50 μm), very similarly to the negative control  
390 experiment (Figure 7) (Martinho de Brito et al., 2022). The high concentration of Ca<sup>2+</sup> in the medium (83 μM) compared to the initial [Ca<sup>2+</sup>] at the beginning of the  
391 experiment (103 μM), indicates that a small amount of calcium ions was bound to negatively charged functional groups of EPS (Table 1, see [Ca<sup>2+</sup>]).

392 In our batch experiment, cells continue to grow exponentially for ~20 days of cultivation. At this point, cultures reached the maximum cell density (Figure 1A) and  
393 pH values ranged between 10-11 (Figure 1B). Based on our calculations, under these alkaline conditions, CO<sub>2</sub> was completely depleted ( $1.7 \times 10^{-3}$  μM) in the growth  
394 medium, whereas HCO<sub>3</sub><sup>-</sup> was extremely low (~ 79 μM). Thus, the dominant inorganic carbon speciation was CO<sub>3</sub><sup>2-</sup> (421 μM). Because cells cannot take up CO<sub>3</sub><sup>2-</sup> and  
395 HCO<sub>3</sub><sup>-</sup> concentration seems to be insufficient to cover the carbon demands of cyanobacterial growth, we assume that this may have been the cause of cell numbers  
396 starting to level off (Figure 1A, early stationary phase). Consequently, cultures entered a stationary state due to a lack of inorganic carbon availability required to  
397 increase cell population (Miller et al., 1984; Mayo et al., 1989; Verspagen et al., 2014). The excess of nutrients measured in the medium in the late exponential phase  
398 (Table 1) suggested that the specific growth rate was not limited by nutrient availability but by a rather low level of CO<sub>2</sub> carbon content.

399

400

#### 401 **4.2 Early stationary phase**

402 Insufficient CO<sub>2</sub> availability is considered to be the external stress factor constraining the growth rate of cyanobacteria (Maberly, 1996; Hein, 1997; Ibelings and  
403 Maberly, 1998) and low [HCO<sub>3</sub><sup>-</sup>] could sustain a constant population density for at least ~ 40 days (See Figure 1A, stationary phase). Our results suggest that at this  
404 point, carbon fixation was allocated to EPS synthesis, not to biomass production (Miller et al., 1984). Increased EPS production is usually associated with external  
405 stress factors (Rossi and De Philippis, 2015), including high pH conditions (Martinho de Brito et al., 2022). Moreover, metabolic stress may also alter the composition  
406 of EPS (Babele et al., 2019; Martinho de Brito et al., 2022). In the present study, the negative functional group abundance increased, resulting in a higher acidity of  
407 EPS (Figure 4, lanes 4-5) due to an increase in protein and sulfated glycan (GAG) (Table 3). In the pH conditions of the early stationary phase, all the functional  
408 groups of the EPS matrix are deprotonated and are able to bind calcium ions (Figure 5B) (Dupraz and Visscher, 2005; Braissant et al., 2007; Dittrich and Sibling, 2010)  
409 and bind calcium more efficiently nanometric nuclei in formation (if their formation is thermodynamically favoured). We suggest that the increased calcium-binding  
410 capacity of the EPS probably accounts for lower the Ca<sup>2+</sup> concentration measured in the medium (Table 2, see [Ca<sup>2+</sup>]). In our *in vitro* forced precipitation assay, we  
411 measure the second effect, the inhibitory one (mineral-binding effect), which results in the production of small-sized calcium carbonate crystals (< 50 μm), in  
412 comparison to what happens in the exponential phase (Figure 7).

413

#### 414 4.3 Late stationary phase

415 As mentioned above, we assume that the continuous increase in EPS production over the late stationary phase, including an overall augmentation of negatively charged  
416 functional groups (Figure 4, lanes 6-7), including GAG content (Table 2), might be a specific response to a stress scenario. As expected, the present study shows that  
417 the greater amount of negatively charged functional groups of EPS from the late stationary phase (Figure 4, lanes 6-7) resulted in a higher Ca-binding capacity than  
418 exponential and early stationary phase-EPS (Figure 5C). Our forced precipitation experiments showed that minerals produced in the late stationary-EPS solutions are  
419 smaller and more abundant than those formed in EPS solutions from the early stationary phase (Figure 7). Under natural conditions, when the  $\text{Ca}^{2+}$  supply is continuous,  
420 the crystals may or may not continue to grow, depending on the physical space within the EPS matrix (Dupraz et al., 2009). Based on the high concentration of nitrate  
421 ( $4720 \mu\text{M}$ ) measured in the late stationary phase (Table 1), we assume that the abundance of this nutrient supported the persistence of the stationary phase, i.e., similar  
422 to a prolonged bloom in natural conditions. The death phase was not observed in our 56-day-long experiment. Given that our cultures were continuously stirred, we  
423 can assume that light was not limiting cyanobacterial growth. Furthermore, in natural blooms, the increase in population density may affect cells at greater depth  
424 through self-shading by decreasing the light available for photosynthesis (Townsend et al., 1994). Yet, cyanobacteria (including *Synechococcus*) are known to be well-  
425 adapted to low-light conditions (Campbell and Carpenter, 1986; Palenik, 2001; Callieri et al., 2011). Additionally, the presence of sulfated constituents on late  
426 stationary phase-EPS contributes to a higher negative charge of the matrix and higher Ca-binding potential (Decho and Kawaguchi, 2003; Skoog et al., 2022), compared  
427 to EPS extracted in the exponential phase which contained significantly lower GAG (Table 2). The present study shows that the greater amount of negatively charged  
428 functional groups of EPS from the late stationary phase (Figure 4, lanes 6-7) resulted in a higher Ca-binding capacity than exponential and early stationary phase-EPS  
429 (Figure 5C). Our forced precipitation experiments showed that minerals produced in the late stationary-EPS solutions are smaller and more abundant than those  
430 formed in EPS solutions from the early stationary phase (Figure 7), suggesting an increased inhibitory ability of the late stationary-EPS.

431

#### 432 4.4 Natural bloom and formation of whittings – Conceptual model

433 Our observations made during exponential and stationary phases can be applied to generate a conceptual model of EPS properties during a *Synechococcus* bloom  
434 event (Figure 8A-C). The onset of a bloom starts with an increase in cell numbers, with high values in spring-summer (exceeding  $10^5$ - $10^7$  cells.mL<sup>-1</sup>) and lower values  
435 in winter months ( $< 10^5$  cells.mL<sup>-1</sup>) in both marine (Agawin et al., 1998; Philips et al., 1999) and freshwater (Maeda et al., 1992; Tai and Palenik, 2009) environments.  
436 This resembles the exponential growth phase in our study (Figure 1, exponential phase). We predict that during the initial phase of a natural bloom, there is little EPS  
437 production: cells grow relatively quickly and the carbon fixed during photosynthesis is predominantly allocated to biomass production (Figure 8A). The fast growth  
438 is followed by a phase during which cell numbers level off, typically due to stress conditions, which is represented by the early stationary phase in our study. Under  
439 certain conditions, blooms can be sustained for weeks and possibly longer (Anderson et al., 2002; Havens, 2008; Zhao et al., 2013), similar to what we observed in  
440 our growth experiments (Figure 1A, early stationary phase). The maintenance of a bloom requires continuous input of nutrients, which is also the case in our experiment  
441 (Table 1) or in the case of natural systems, a turnover from lysing cells recycled by other microbes. During this phase, we did not observe a significant increase in cell  
442 density but the production of EPS continued at a disproportionately high rate (Figure 8B-C). Our findings are in agreement with the lab studies using diatom cultures  
443 which show that EPS production is low during exponential growth and increases in the stationary phase (Myklestad and Haug, 1972; Myklestad et al., 1989; Bhosle  
444 et al., 1995). These authors reported that nutrient-deficient conditions enhanced the production of EPS over the growth phases. If carbon fixation continues and some  
445 critically required nutrient is lacking from the growth medium, most likely the phototrophic organisms produce carbohydrate reservoirs (Ciebiada et al., 2020). These  
446 include storage polymers like glycogen and the production of other carbohydrate-rich compounds, including EPS (De Philippis et al., 1996, 2001; Decho and Gutierrez,  
447 2017). The decline of blooms in natural environments is typically associated with nutrient, low or high light intensity, grazing or viral infection. Under these stressful  
448 conditions, an increase in EPS production by the phyto/picoplankton community may be expected.

449

450 *Synechococcus* spp. blooms can cause whiting events (Thompson, 2000), characterized by the presence of large amounts of  $\text{CaCO}_3$  minerals in surface water. Various  
451 mechanisms have been proposed for this phenomenon, including chemical and physical processes (Shinn and Steinen, 1989; Larson and Mylroie, 2014) as well as  
452 biologically mediated precipitation (Thompson and Ferris, 1990; Robbins and Blackwelder, 1992; Stanton et al., 2021). However, no consensus has been reached on  
453 the precise cause of these events. Carefully transporting the results from forced precipitation experiments to a whiting event, we suggest that early in the bloom (Figure  
454 8A), relatively large  $\text{CaCO}_3$  crystals form, provided sufficient  $\text{Ca}^{2+}$  is available (Figure 8D). As the bloom continues to grow, progressively the larger quantity of  
455 negatively charged functional groups in the EPS provides more cation-binding sites and thus inhibits calcium carbonate precipitation largely. Depending on the three-  
456 dimensional structure of the EPS and surface properties (Wang et al., 2012), nucleation may yield smaller  $\text{CaCO}_3$  crystals (Figure 8). If this occurs, then the production  
457 of a more negatively charged matrix (largely contributed by the enrichment in sulfated polysaccharides) may offer some selective advantage to the cyanobacteria  
458 population, by inhibiting and/or delaying mineral precipitation and by reducing crystal size formed around the cells. This might result in slow sinking rates, extending  
459 the residence time of the cyanobacterial community in the photic zone. If the bloom occurrence is short (e.g., similar to 14-28 days in our growth experiment), minerals  
460 making up the whiting will be relatively larger. Consequently, the aggregates of cyanobacteria, EPS and  $\text{CaCO}_3$  minerals may sink faster because mineral precipitation  
461 in EPS increases the cyanobacterial-specific density several-fold. The *Synechococcus* specific density ( $\rho$ ) is  $1.040 \text{ g}\cdot\text{cm}^{-3}$  (Reynolds, 1987), near-neutrally buoyant,  
462 whereas  $\rho_{\text{calcite}}$  is  $2.710 \text{ g}\cdot\text{cm}^{-3}$  (Lange, 1999). The production of larger amounts of more negatively charged EPS may act as a protection mechanism against carbonate  
463 formation in the vicinity of the cell wall (Martinez et al., 2010; Bundeleva et al., 2012), thus allowing the organisms to reside longer in the photic zone. Interestingly,  
464 the production of EPS that contained sulfated groups among bacteria seems to be exclusive to cyanobacteria (Pereira et al., 2009; Maeda et al., 2021). Maeda et al.  
465 (2021) reported that the cyanobacterium *Synechocystis* 6803 produced large amounts of GAG compounds during an experimental bloom formation. The authors  
466 suggested that these constituents can be advantageous for the development of surface bloom as it may increase the buoyancy, permitting cells to migrate upward  
467 rapidly when the water column is stable (Walsby et al., 1995). Thus, GAG production may be considered as an alternative for organisms that lack gas vesicles to  
468 remain longer in the photic zone (Maeda et al., 2021). The negative charge of EPS produced containing high sulfated content also protects the community against viral  
469 infection (Matsunaga et al., 1996). Therefore, the production of GAG by pelagic cyanobacteria contributes to stress tolerance and viral infectivity, helping in the  
470 persistence of bloom. In our growth experiments, a decline in cell numbers was not observed, which would represent the end of the bloom. In the natural environment,  
471 nutrient depletion, grazing or viral lysis/infection are the most likely causes of terminating a bloom (Gons et al., 2002). The cell lysis releases organic matter, which

472 supports the growth of heterotrophic bacteria (Kjelleberg et al., 1987; Hagström et al., 1988; Kieft et al., 2021). Photosynthetically derived organic carbon is one of the  
 473 major carbon and energy sources for heterotrophic bacteria (Allgaier et al., 2008). These heterotrophs can degrade EPS and liberate bound  $\text{Ca}^{2+}$  (Visscher et al. 1998;  
 474 Ionescu et al., 2015; Diaz et al., 2017). In addition, microbial respiration will produce  $\text{HCO}_3^-/\text{CO}_2$ , increasing the saturation index of  $\text{CaCO}_3$ , and may enhance the  
 475 whiting (Figure 8). Although our model is [somewhat] largely theoretical at this stage and explore the role of one picoplankton species, its merit is to focus on an  
 476 overlooked actor of whiting events, the EPS. Furthermore, it provides a conceptual framework to work with, for designing novel experiments and measurements both  
 477 in natural systems and at the lab bench, to validate the molecular mechanisms involved in microbial bloom associated  $\text{CaCO}_3$  formation in marine and lacustrine  
 478 models.  
 479  
 480

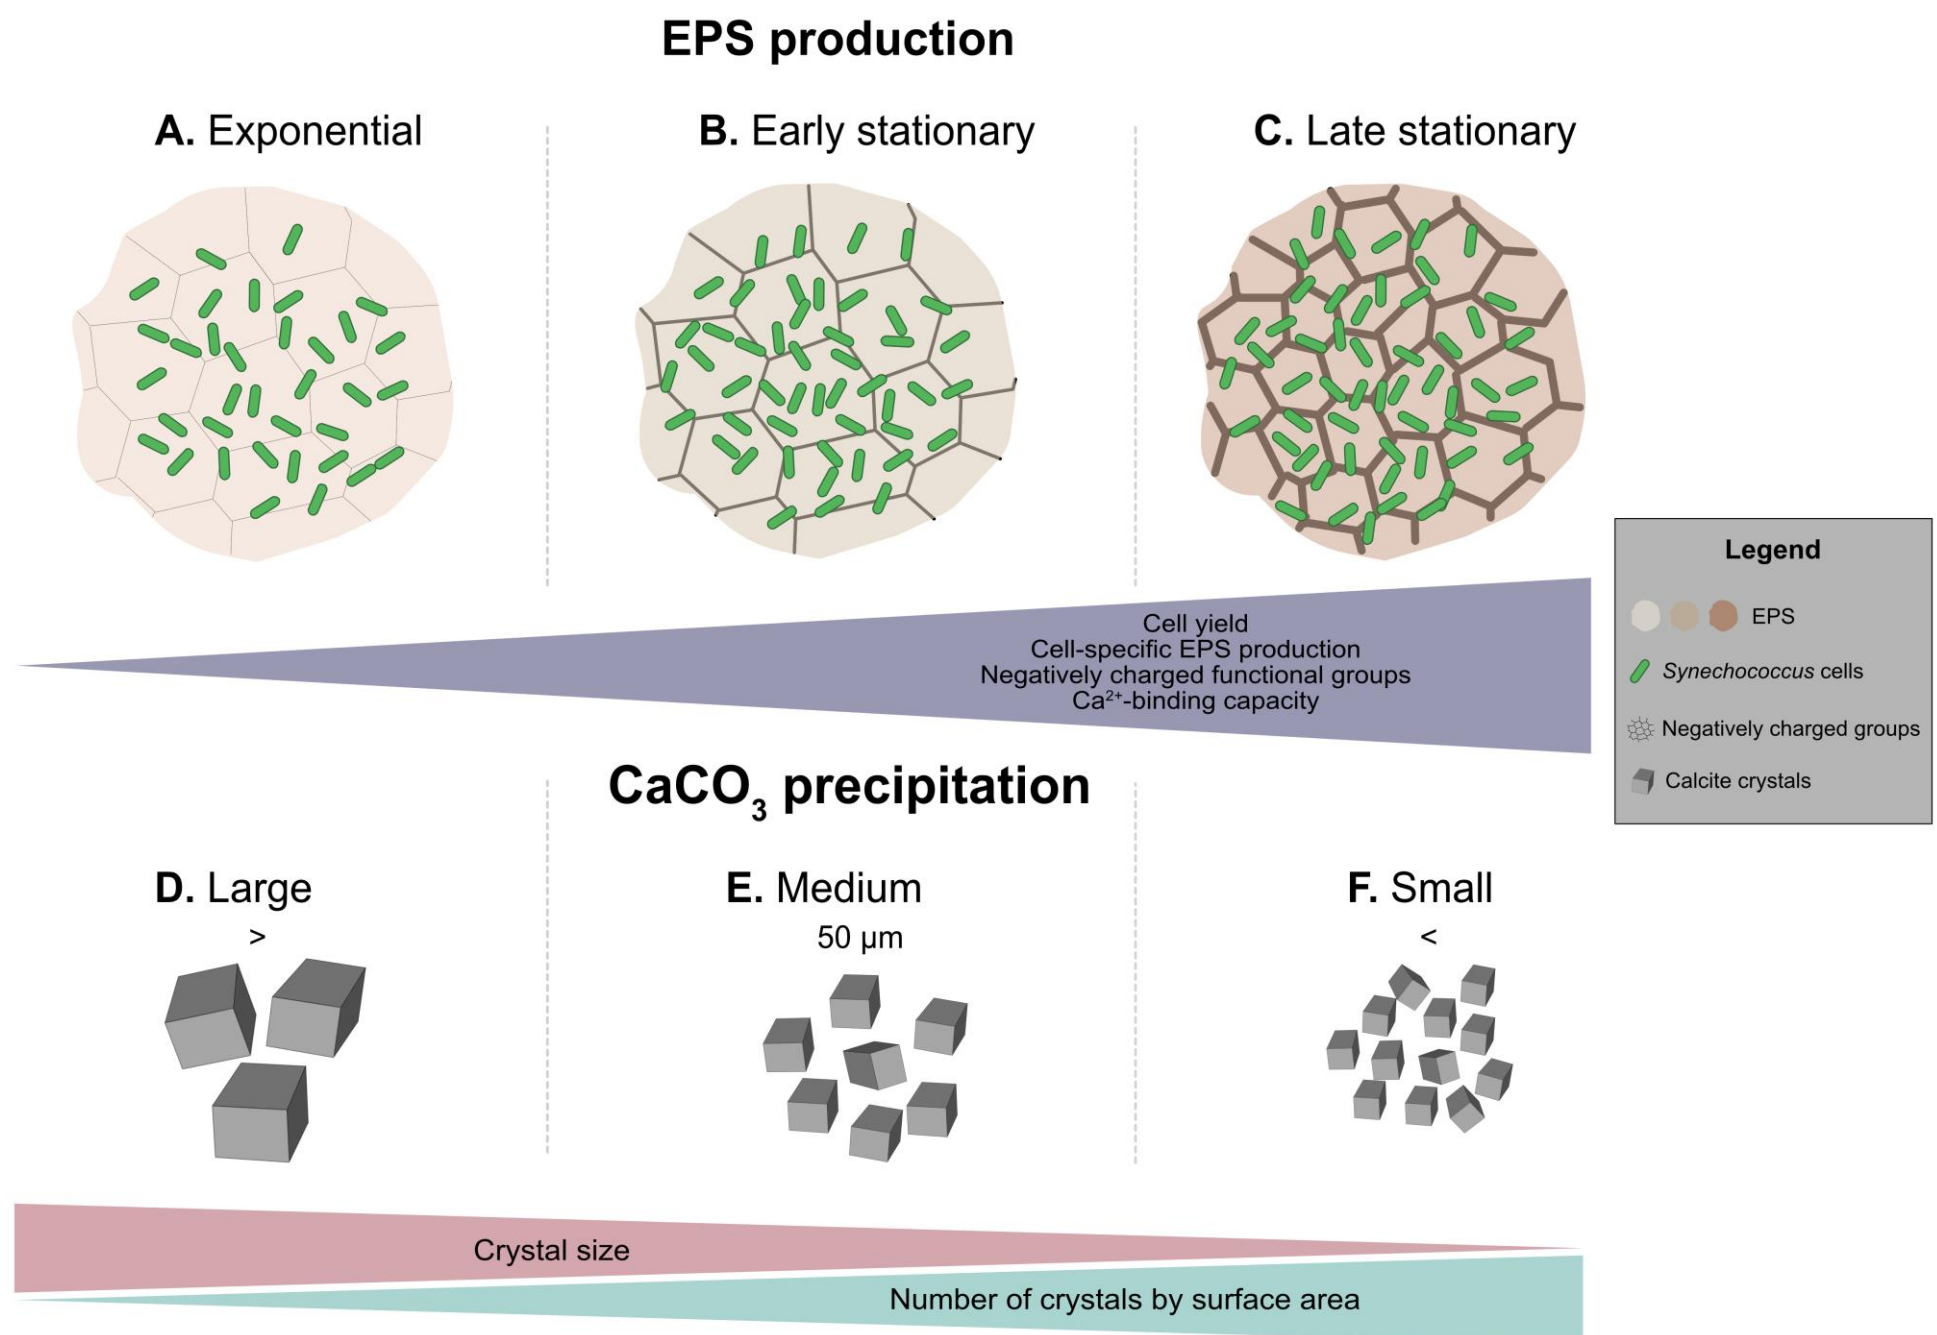

481  
 482 **Figure 8.** Conceptual diagram of proposed EPS-supported carbonate precipitation mechanism explaining the origin of whiting events.

483 **Data availability**

484 All raw data can be provided by the corresponding authors upon request.

485 **Author contributions**

486 M.M.d.B., I.B. and P.T.V. designed the study in a project directed by P.T.V., I.B. and E.V.; M.M.d.B., I.B., P.T.V., F.M., A.W. and L.P. developed the methodology;  
 487 M.M.d.B. and I.B. carried out the laboratory measurements; M.M.d.B., P.T.V. and I.B. analysed the data; M.M.d.B. wrote the manuscript draft with significant  
 488 contributions of P.T.V. and I.B. M.M.d.B., P.T.V., I.B., E.V., F.M., A.W and L.P. reviewed and edited the manuscript. All authors have read and agreed to the  
 489 published version of the manuscript.

490 **Competing interests**

491 The authors declare that they have no conflict of interest.

492 **Acknowledgements**

493 We thank to Nelly Debrosse (Bourgogne Franche-Comté University, Dijon), Adrien Force (Bourgogne Franche-Comté University, Dijon) and Elodie Cognard  
 494 (Bourgogne Franche-Comté University, Dijon) for helping with the measurements; Michel Picquet and Christine Stern (ICMUB Institut de Chimie Moléculaire,  
 495 Bourgogne Franche-Comté University, Dijon, France) for their technical assistance with FT-IR analysis; Christophe Loup and Nadia Crini (Laboratoire Chrono-  
 496 environnement, UMR CNRS 6249, Bourgogne Franche-Comté University, Besançon, France) for their technical assistance with Ion chromatography and ICP analyses.  
 497 The authors would like to thank the reviewers whose work has helped to improve the manuscript. All individuals included in this section have consented to the  
 498 acknowledgement.

499 **Financial support**

500 This study is a contribution of the SEDS and SAMBA teams of Biogeosciences laboratory (Bourgogne Franche-Comté University, Dijon, France) to the I-SITE project  
501 UB18016-BGSIS.

502 **References**

- 503 Addadi, L. and Weiner, S.: Interactions between acidic proteins and crystals: stereochemical requirements in biomineralization., *Proceedings of the National Academy of Sciences*,  
504 82, 4110–4114, 1985.
- 505 Agawin, N., Duarte, C., and Agustí, S.: Growth and abundance of *Synechococcus* sp. in a Mediterranean Bay: seasonality and relationship with temperature, *Mar. Ecol. Prog. Ser.*,  
506 170, 45–53, <https://doi.org/10.3354/meps170045>, 1998.
- 507 Aizawa, K. and Miyachi, S.: Carbonic anhydrase and CO<sub>2</sub> concentrating mechanisms in microalgae and cyanobacteria, *FEMS Microbiology Letters*, 39, 215–233,  
508 <https://doi.org/10.1111/j.1574-6968.1986.tb01860.x>, 1986.
- 509 Albeck, S., Aizenberg, J., Addadi, L., and Weiner, S.: Interactions of various skeletal intracrystalline components with calcite crystals, *Journal of the American Chemical Society*, 115,  
510 11691–11697, 1993.
- 511 Allen, M. M.: Simple Conditions for Growth of Unicellular Blue-Green Algae on Plates 1, 2, *Journal of phycology*, 4, 1–4, 1968.
- 512 Anderson, D. M., Glibert, P. M., and Burkholder, J. M.: Harmful algal blooms and eutrophication: Nutrient sources, composition, and consequences, *Estuaries*, 25, 704–726,  
513 <https://doi.org/10.1007/BF02804901>, 2002.
- 514 Babel, P. K., Kumar, J., and Chaturvedi, V.: Proteomic de-regulation in cyanobacteria in response to abiotic stresses, *Frontiers in Microbiology*, 1315, 2019.
- 515 Badger, M. R. and Andrews, T. J.: Photosynthesis and Inorganic Carbon Usage by the Marine Cyanobacterium, *Synechococcus* sp, *Plant Physiol.*, 70, 517–523,  
516 <https://doi.org/10.1104/pp.70.2.517>, 1982.
- 517 Badger, M. R. and Price, G. D.: The CO<sub>2</sub> concentrating mechanism in cyanobacteria and microalgae, *Physiologia Plantarum*, 84, 606–615, 1992.
- 518 Badger, M. R. and Price, G. D.: The role of carbonic anhydrase in photosynthesis, *Annual review of plant biology*, 45, 369–392, 1994.
- 519 Badger, M. R., Hanson, D., and Price, G. D.: Evolution and diversity of CO<sub>2</sub> concentrating mechanisms in cyanobacteria, *Functional Plant Biology*, 29, 161–173, 2002.
- 520 Badger, M. R., Price, G. D., Long, B. M., and Woodger, F. J.: The environmental plasticity and ecological genomics of the cyanobacterial CO<sub>2</sub> concentrating mechanism, *Journal of*  
521 *Experimental Botany*, 57, 249–265, <https://doi.org/10.1093/jxb/eri286>, 2006.
- 522 Bhosle, N. B., Sawant, S. S., Garg, A., and Wagh, A. B.: Isolation and Partial Chemical Analysis of Exopolysaccharides from the Marine Fouling Diatom *Navicula subinflata*, *Botanica*  
523 *Marina*, 38, <https://doi.org/10.1515/botm.1995.38.1-6.103>, 1995.
- 524 Borman, A. H., Jong, E. W., Huizinga, M., Kok, D. J., Westbroek, P., and Bosch, L.: The Role in CaCO<sub>3</sub> Crystallization of an Acid Ca<sup>2+</sup>-Binding Polysaccharide Associated with  
525 Cocoliths of *Emiliania huxleyi*, *Eur J Biochem*, 129, 179–183, <https://doi.org/10.1111/j.1432-1033.1982.tb07037.x>, 1982.
- 526 Braissant, O., Cailteau, G., Dupraz, C., and Verrecchia, E. P.: Bacterially induced mineralization of calcium carbonate in terrestrial environments: the role of exopolysaccharides and  
527 amino acids, *Journal of Sedimentary Research*, 73, 485–490, 2003.
- 528 Braissant, O., Decho, A. W., Dupraz, C., Glunk, C., Przekop, K. M., and Visscher, P. T.: Exopolymeric substances of sulfate-reducing bacteria: interactions with calcium at alkaline  
529 pH and implication for formation of carbonate minerals, *Geobiology*, 5, 401–411, 2007.
- 530 Bundeleva, I. A., Shirokova, L. S., Bénézeth, P., Pokrovsky, O. S., Kompantseva, E. I., and Balor, S.: Calcium carbonate precipitation by anoxygenic phototrophic bacteria, *Chemical*  
531 *Geology*, 291, 116–131, <https://doi.org/10.1016/j.chemgeo.2011.10.003>, 2012.
- 532 Bundeleva, I. A., Shirokova, L. S., Pokrovsky, O. S., Bénézeth, P., Ménez, B., Gérard, E., and Balor, S.: Experimental modeling of calcium carbonate precipitation by cyanobacterium  
533 *Gloeocapsa* sp., *Chemical Geology*, 374–375, 44–60, <https://doi.org/10.1016/j.chemgeo.2014.03.007>, 2014.
- 534 Burnap, R., Hagemann, M., and Kaplan, A.: Regulation of CO<sub>2</sub> Concentrating Mechanism in Cyanobacteria, *Life*, 5, 348–371, <https://doi.org/10.3390/life5010348>, 2015.
- 535 Callieri, C. and Stockner, J.: Picocyanobacteria success in oligotrophic lakes: fact or fiction?, *J Limnol*, 59, 72, <https://doi.org/10.4081/jlimnol.2000.72>, 2000.
- 536 Callieri, C., Lami, A., and Bertoni, R.: Microcolony Formation by Single-Cell *Synechococcus* Strains as a Fast Response to UV Radiation, *Appl Environ Microbiol*, 77, 7533–7540,  
537 <https://doi.org/10.1128/AEM.05392-11>, 2011.
- 538 Campbell, L. and Carpenter, E. J.: Diel patterns of cell division in marine *Synechococcus* spp. (Cyanobacteria): use of the frequency of dividing cells technique to measure growth  
539 rate, 1986.
- 540 Ciebiada, M., Kubiak, K., and Daroch, M.: Modifying the Cyanobacterial Metabolism as a Key to Efficient Biopolymer Production in Photosynthetic Microorganisms, *IJMS*, 21, 7204,  
541 <https://doi.org/10.3390/ijms21197204>, 2020.
- 542 Clark, D. R. and Flynn, K. J.: The relationship between the dissolved inorganic carbon concentration and growth rate in marine phytoplankton, *Proc. R. Soc. Lond. B*, 267, 953–959,  
543 <https://doi.org/10.1098/rspb.2000.1096>, 2000.
- 544 Coates, J.: Interpretation of infrared spectra, a practical approach, 2000.
- 545 Coello-Camba, A. and Agustí, S.: Picophytoplankton Niche Partitioning in the Warmest Oligotrophic Sea, *Front. Mar. Sci.*, 8, 651877, <https://doi.org/10.3389/fmars.2021.651877>,  
546 2021.
- 547 De Philippis, R., Sili, C., and Vincenzini, M.: Response of an exopolysaccharide-producing heterocystous cyanobacterium to changes in metabolic carbon flux, *Journal of Applied*  
548 *Phycology*, 8, 275–281, 1996.
- 549 De Philippis, R., Sili, C., Paperi, R., and Vincenzini, M.: Exopolysaccharide-producing cyanobacteria and their possible exploitation: a review, *Journal of Applied Phycology*, 13,  
550 293–299, 2001.
- 551 Decho, A. W. and Gutierrez, T.: Microbial extracellular polymeric substances (EPSs) in ocean systems, *Frontiers in microbiology*, 8, 922, 2017.
- 552 Decho, A. W. and Kawaguchi, T.: Extracellular polymers (EPS) and calcification within modern marine stromatolites, in: *Fossil and Recent Biofilms*, Springer, 227–240, 2003.
- 553 Diaz, M. R., Eberli, G. P., Blackwelder, P., Phillips, B., and Swart, P. K.: Microbially mediated organomineralization in the formation of ooids, *Geology*, 45, 771–774,  
554 <https://doi.org/10.1130/G39159.1>, 2017.
- 555 Dittrich, M. and Obst, M.: Are picoplankton responsible for calcite precipitation in lakes?, *AMBIO: A Journal of the Human Environment*, 33, 559–564, 2004.
- 556 Dittrich, M. and Sibling, S.: Calcium carbonate precipitation by cyanobacterial polysaccharides, *Geological Society, London, Special Publications*, 336, 51–63, 2010.



- 557 Dittrich, M., Müller, B., Mavrocordatos, D., and Wehrli, B.: Induced calcite precipitation by cyanobacterium *Synechococcus*, *Acta hydrochimica et hydrobiologica*, 31, 162–169, 2003.
- 558 Dokulil, M. T. and Teubner, K.: Cyanobacterial dominance in lakes, 2000.
- 559 Dubois, M., Gilles, K. A., Hamilton, J. K., Rebers, P. t, and Smith, F.: Colorimetric method for determination of sugars and related substances, *Analytical chemistry*, 28, 350–356,  
560 1956.
- 561 Dupraz, C. and Visscher, P. T.: Microbial lithification in marine stromatolites and hypersaline mats, *Trends in microbiology*, 13, 429–438, 2005.
- 562 Dupraz, C., Reid, R. P., Braissant, O., Decho, A. W., Norman, R. S., and Visscher, P. T.: Processes of carbonate precipitation in modern microbial mats, *Earth-Science Reviews*, 96,  
563 141–162, <https://doi.org/10.1016/j.earscirev.2008.10.005>, 2009.
- 564 Giordano, M., Beardall, J., and Raven, J. A.: CO<sub>2</sub> Concentrating Mechanisms in Algae: Mechanisms, Environmental Modulation, and Evolution, *Annu. Rev. Plant Biol.*, 56, 99–131,  
565 <https://doi.org/10.1146/annurev.arplant.56.032604.144052>, 2005.
- 566 Gons, H. J., Ebert, J., Hoogveld, H. L., Takkenberg, W., and Woldringh, C. J.: Observations on cyanobacterial population collapse in eutrophic lake water, 2002.
- 567 Hagström, Å., Azam, F., Andersson, A., Wikner, J., and Rassoulzadegan, F.: Microbial loop in an oligotrophic pelagic marine ecosystem: possible roles of cyanobacteria and  
568 nanoflagellates in the organic fluxes, *Mar. Ecol. Prog. Ser.*, 49, 171–178, <https://doi.org/10.3354/meps049171>, 1988.
- 569 Havens, K. E.: Chapter 33: Cyanobacteria blooms: effects on aquatic ecosystems, 2008.
- 570 Hein, M.: Inorganic carbon limitation of photosynthesis in lake phytoplankton, *Freshwater Biology*, 37, 545–552, <https://doi.org/10.1046/j.1365-2427.1997.00180.x>, 1997.
- 571 Heisler, J., Glibert, P. M., Burkholder, J. M., Anderson, D. M., Cochlan, W., Dennison, W. C., Dortch, Q., Gobler, C. J., Heil, C. A., Humphries, E., Lewitus, A., Magnien, R., Marshall,  
572 H. G., Sellner, K., Stockwell, D. A., Stoecker, D. K., and Suddleson, M.: Eutrophication and harmful algal blooms: A scientific consensus, *Harmful Algae*, 8, 3–13,  
573 <https://doi.org/10.1016/j.hal.2008.08.006>, 2008.
- 574 Hodell, D. A., Schelske, C. L., Fahnenstiel, G. L., and Robbins, L. L.: Biologically induced calcite and its isotopic composition in Lake Ontario, *Limnology and Oceanography*, 43,  
575 187–199, 1998.
- 576 Huisman, J., Codd, G. A., Paerl, H. W., Ibelings, B. W., Verspagen, J. M. H., and Visser, P. M.: Cyanobacterial blooms, *Nat Rev Microbiol*, 16, 471–483,  
577 <https://doi.org/10.1038/s41579-018-0040-1>, 2018.
- 578 Ibelings, B. W. and Maberly, S. C.: Photoinhibition and the availability of inorganic carbon restrict photosynthesis by surface blooms of cyanobacteria, *Limnology and Oceanography*,  
579 43, 408–419, 1998a.
- 580 Ionescu, D., Spitzer, S., Reimer, A., Schneider, D., Daniel, R., Reitner, J., de Beer, D., and Arp, G.: Calcium dynamics in microbialite-forming exopolymer-rich mats on the atoll of  
581 Kiritimati, Republic of Kiribati, Central Pacific, *Geobiology*, 13, 170–180, <https://doi.org/10.1111/gbi.12120>, 2015.
- 582 Kamennaya, N., Ajo-Franklin, C., Northen, T., and Jansson, C.: Cyanobacteria as Biocatalysts for Carbonate Mineralization, *Minerals*, 2, 338–364,  
583 <https://doi.org/10.3390/min2040338>, 2012.
- 584 Kansiz, M., Heraud, P., Wood, B., Burden, F., Beardall, J., and McNaughton, D.: Fourier Transform Infrared microspectroscopy and chemometrics as a tool for the discrimination of  
585 cyanobacterial strains, *Phytochemistry*, 52, 407–417, [https://doi.org/10.1016/S0031-9422\(99\)00212-5](https://doi.org/10.1016/S0031-9422(99)00212-5), 1999.
- 586 Kavita, K., Mishra, A., and Jha, B.: Isolation and physico-chemical characterisation of extracellular polymeric substances produced by the marine bacterium *Vibrio parahaemolyticus*,  
587 *Biofouling*, 27, 309–317, <https://doi.org/10.1080/08927014.2011.562605>, 2011.
- 588 Kawaguchi, T. and Decho, A. W.: Isolation and biochemical characterization of extracellular polymeric secretions (EPS) from modern soft marine stromatolites (Bahamas) and its  
589 inhibitory effect on CaCO<sub>3</sub> precipitation, *Preparative Biochemistry and Biotechnology*, 32, 51–63, 2002.
- 590 Kieft, B., Li, Z., Bryson, S., Hettich, R. L., Pan, C., Mayali, X., and Mueller, R. S.: Phytoplankton exudates and lysates support distinct microbial consortia with specialized metabolic  
591 and ecophysiological traits, *Proc. Natl. Acad. Sci. U.S.A.*, 118, e2101178118, <https://doi.org/10.1073/pnas.2101178118>, 2021.
- 592 Kjelleberg, S., Hermansson, M., Marden, P., & Jones, G. W.: The transient phase between growth and non-growth of heterotrophic bacteria, with emphasis on the marine environment,  
593 *Annual Reviews in Microbiology*, 41(1), 25-49, 1987.
- 594
- 595 Kupriyanova, E. V. and Pronina, N. A.: Carbonic anhydrase: Enzyme that has transformed the biosphere, *Russ J Plant Physiol*, 58, 197–209,  
596 <https://doi.org/10.1134/S1021443711020099>, 2011.
- 597 Kupriyanova, E. V., Sinetova, M. A., Bedbenov, V. S., Pronina, N. A., and Los, D. A.: Putative extracellular  $\alpha$ -Class carbonic anhydrase, EcaA, of *Synechococcus elongatus* PCC  
598 7942 is an active enzyme: A sequel to an old story, *Microbiology*, 164, 576–586, 2018.
- 599 Lange, N. A.: Lange's handbook of chemistry, 15. ed., edited by: Dean, J. A., McGraw-Hill, New York, NY, 1999.
- 600 Larson, E. B. and Myroie, J. E.: A review of whiting formation in the Bahamas and new models, *Carbonates and Evaporites*, 29, 337–347, 2014.
- 601 Liu, L., Huang, Q., and Qin, B.: Characteristics and roles of *Microcystis* extracellular polymeric substances (EPS) in cyanobacterial blooms: a short review, *Journal of Freshwater  
602 Ecology*, 33, 183–193, <https://doi.org/10.1080/02705060.2017.1391722>, 2018.
- 603 Lürling, M., Mello, M. M. e, van Oosterhout, F., de Senerpont Domis, L., and Marinho, M. M.: Response of Natural Cyanobacteria and Algae Assemblages to a Nutrient Pulse and  
604 Elevated Temperature, *Front. Microbiol.*, 9, 1851, <https://doi.org/10.3389/fmicb.2018.01851>, 2018.
- 605 Maberly, S. C.: Diel, episodic and seasonal changes in pH and concentrations of inorganic carbon in a productive lake, *Freshwater Biology*, 35, 579–598, [https://doi.org/10.1111/j.1365-2427.1996.tb01770.x](https://doi.org/10.1111/j.1365-<br/>606 2427.1996.tb01770.x), 1996.
- 607 Maeda, H., Kawai, A., and Tilzer, M. M.: The water bloom of Cyanobacterial picoplankton in Lake Biwa, Japan, *Hydrobiologia*, 248, 93–103, <https://doi.org/10.1007/BF00006077>,  
608 1992.
- 609 Marin, F., Corstjens, P., de Gaulejac, B., de Vrind-De Jong, E., and Westbroek, P.: Mucins and molluscan calcification: molecular characterization of mucoperlin, a novel mucin-like  
610 protein from the nacreous shell layer of the fan mussel *Pinna nobilis* (Bivalvia, Pteriomorpha), *Journal of Biological Chemistry*, 275, 20667–20675, 2000.
- 611 Martinez, R. E., Gardés, E., Pokrovsky, O. S., Schott, J., and Oelkers, E. H.: Do photosynthetic bacteria have a protective mechanism against carbonate precipitation at their surfaces?,  
612 *Geochimica et Cosmochimica Acta*, 74, 1329–1337, <https://doi.org/10.1016/j.gca.2009.11.025>, 2010.
- 613 Martinho de Brito, M., Bundeleva, I., Marin, F., Vennin, E., Wilton, A., Plasseraud, L., and Visscher, P. T.: Effect of Culture pH on Properties of Exopolymeric Substances from  
614 *Synechococcus* PCC7942: Implications for Carbonate Precipitation, *Geosciences*, 12, 210, <https://doi.org/10.3390/geosciences12050210>, 2022.
- 615 Marvasi, M., Visscher, P. T., and Casillas Martinez, L.: Exopolymeric substances (EPS) from *Bacillus subtilis*: polymers and genes encoding their synthesis, *FEMS microbiology  
616 letters*, 313, 1–9, 2010.
- 617 Mayo, W. P., Elrifi, I. R., and Turpin, D. H.: The Relationship between Ribulose Bisphosphate Concentration, Dissolved Inorganic Carbon (DIC) Transport and DIC-Limited  
618 Photosynthesis in the Cyanobacterium *Synechococcus leopoliensis* Grown at Different Concentrations of Inorganic Carbon, *Plant Physiol.*, 90, 720–727,  
619 <https://doi.org/10.1104/pp.90.2.720>, 1989.

- 620 Miller, A. G., Turpin, D. H., and Canvin, D. T.: Growth and Photosynthesis of the Cyanobacterium *Synechococcus leopoliensis* in HCO<sub>3</sub><sup>-</sup> Limited Chemostats, *Plant Physiol.*, 75,  
621 1064–1070, <https://doi.org/10.1104/pp.75.4.1064>, 1984.
- 622 Mitterer, R. M. and Cunningham, R.: The interaction of natural organic matter with grain surfaces: implications for calcium carbonate precipitation, 1985.
- 623 Murphy, L. S. and Haugen, E. M.: The distribution and abundance of phototrophic ultraplankton in the North Atlantic 1,2: Phototrophic ultraplankton, *Limnol. Oceanogr.*, 30, 47–58,  
624 <https://doi.org/10.4319/lo.1985.30.1.0047>, 1985.
- 625 Myklestad, S. and Haug, A.: Concentration of Nutrients in Culture Medium, 1972.
- 626 Myklestad, S., Holm-Hansen, O., Vårum, K. M., and Volcani, B. E.: Rate of release of extracellular amino acids and carbohydrates from the marine diatom *Chaetoceros affinis*, *J*  
627 *Plankton Res.*, 11, 763–773, <https://doi.org/10.1093/plankt/11.4.763>, 1989.
- 628 Obst, M., Dynes, J. J., Lawrence, J. R., Swerhone, G. D., Benzerara, K., Karunakaran, C., Kaznatcheev, K., Tylistczak, T., and Hitchcock, A. P.: Precipitation of amorphous CaCO<sub>3</sub>  
629 (aragonite-like) by cyanobacteria: a STXM study of the influence of EPS on the nucleation process, *Geochimica et Cosmochimica Acta*, 73, 4180–4198, 2009.
- 630 O’Neil, J. M., Davis, T. W., Burford, M. A., and Gobler, C. J.: The rise of harmful cyanobacteria blooms: The potential roles of eutrophication and climate change, *Harmful Algae*,  
631 14, 313–334, <https://doi.org/10.1016/j.hal.2011.10.027>, 2012.
- 632 Paerl, H.: Chapter 10: Nutrient and other environmental controls of harmful cyanobacterial blooms along the freshwater–marine continuum, 2008.
- 633 Paerl, H. W. and Huisman, J.: Blooms Like It Hot, *Science*, 320, 57–58, <https://doi.org/10.1126/science.1155398>, 2008.
- 634 Paerl, H. W., Fulton, R. S., Moisaner, P. H., and Dyble, J.: Harmful Freshwater Algal Blooms, With an Emphasis on Cyanobacteria, *The Scientific World JOURNAL*, 1, 76–113,  
635 <https://doi.org/10.1100/tsw.2001.16>, 2001.
- 636 Palenik, B.: Chromatic Adaptation in Marine *Synechococcus* Strains, *Appl Environ Microbiol.*, 67, 991–994, <https://doi.org/10.1128/AEM.67.2.991-994.2001>, 2001.
- 637 Pannard, A., Pédrone, J., Bormans, M., Briand, E., Claquin, P., and Lagadeuc, Y.: Production of exopolymers (EPS) by cyanobacteria: impact on the carbon-to-nutrient ratio of the  
638 particulate organic matter, *Aquat Ecol.*, 50, 29–44, <https://doi.org/10.1007/s10452-015-9550-3>, 2016.
- 639 Pereira, S., Zille, A., Micheletti, E., Moradas-Ferreira, P., De Philippis, R., and Tamagnini, P.: Complexity of cyanobacterial exopolysaccharides: composition, structures, inducing  
640 factors and putative genes involved in their biosynthesis and assembly, *FEMS microbiology reviews*, 33, 917–941, 2009.
- 641 Philips, E. J., Badylak, S., and Lynch, T. C.: Blooms of the picoplanktonic cyanobacterium *Synechococcus* in Florida Bay, a subtropical inner-shelf lagoon, *Limnol. Oceanogr.*, 44,  
642 1166–1175, <https://doi.org/10.4319/lo.1999.44.4.1166>, 1999.
- 643 Ploug, H.: Cyanobacterial surface blooms formed by *Aphanizomenon* sp. and *Nodularia spumigena* in the Baltic Sea: Small-scale fluxes, pH, and oxygen microenvironments, *Limnol.*  
644 *Oceanogr.*, 53, 914–921, <https://doi.org/10.4319/lo.2008.53.3.0914>, 2008.
- 645 Pomar, L. and Hallock, P.: Carbonate factories: a conundrum in sedimentary geology, *Earth-Science Reviews*, 87, 134–169, 2008.
- 646 Price, G. D.: Inorganic carbon transporters of the cyanobacterial CO<sub>2</sub> concentrating mechanism, *Photosynth Res.*, 109, 47–57, <https://doi.org/10.1007/s11220-010-9608-y>, 2011.
- 647 Price, G. D., Badger, M. R., Woodger, F. J., and Long, B. M.: Advances in understanding the cyanobacterial CO<sub>2</sub>-concentrating-mechanism (CCM): functional components, Ci  
648 transporters, diversity, genetic regulation and prospects for engineering into plants, *Journal of Experimental Botany*, 59, 1441–1461, <https://doi.org/10.1093/jxb/erm112>, 2008.
- 649 Price, G. D., Maeda, S., Omata, T., and Badger, M. R.: Modes of active inorganic carbon uptake in the cyanobacterium, *Synechococcus* sp. PCC7942, *Functional Plant Biol.*, 29, 131,  
650 <https://doi.org/10.1071/PP01229>, 2002.
- 651 Price, G. D., Sültemeyer, D., Klughammer, B., Ludwig, M., and Badger, M. R.: The functioning of the CO<sub>2</sub> concentrating mechanism in several cyanobacterial strains: a review of  
652 general physiological characteristics, genes, proteins, and recent advances, *Canadian Journal of Botany*, 76, 973–1002, 1998.
- 653 Rae, B. D., Long, B. M., Whitehead, L. F., Förster, B., Badger, M. R., and Price, G. D.: Cyanobacterial Carboxysomes: Microcompartments that Facilitate CO<sub>2</sub> Fixation, *Microb*  
654 *Physiol.*, 23, 300–307, <https://doi.org/10.1159/000351342>, 2013.
- 655 Raven, J. A., Beardall, J., and Sánchez-Baracaldo, P.: The possible evolution and future of CO<sub>2</sub>-concentrating mechanisms, *Journal of Experimental Botany*, 68, 3701–3716, 2017.
- 656 Reynolds, C. S.: Cyanobacterial Water-Blooms, in: *Advances in Botanical Research*, vol. 13, Elsevier, 67–143, [https://doi.org/10.1016/S0065-2296\(08\)60341-9](https://doi.org/10.1016/S0065-2296(08)60341-9), 1987.
- 657 Reynolds, C. S. and Walsby, A. E.: WATER-BLOOMS, *Biological Reviews*, 50, 437–481, <https://doi.org/10.1111/j.1469-185X.1975.tb01060.x>, 1975.
- 658 Rippka, R., Deruelles, J., Waterbury, J. B., Herdman, M., and Stanier, R. Y.: Generic assignments, strain histories and properties of pure cultures of cyanobacteria, *Microbiology*, 111,  
659 1–61, 1979.
- 660 Robbins, L. and Blackwelder, P.: Biochemical and ultrastructural evidence for the origin of whittings: A biologically induced calcium carbonate precipitation mechanism, *Geology*,  
661 20, 464–468, 1992.
- 662 Rossi, F. and De Philippis, R.: Role of cyanobacterial exopolysaccharides in phototrophic biofilms and in complex microbial mats, *Life*, 5, 1218–1238, 2015.
- 663 Sandrini, G., Tann, R. P., Schuurmans, J. M., van Beusekom, S. A. M., Matthijs, H. C. P., and Huisman, J.: Diel Variation in Gene Expression of the CO<sub>2</sub>-Concentrating Mechanism  
664 during a Harmful Cyanobacterial Bloom, *Front. Microbiol.*, 7, <https://doi.org/10.3389/fmicb.2016.00551>, 2016.
- 665 Schultze-Lam, S., Harauz, G., and Beveridge, T. J.: Participation of a cyanobacterial S layer in fine-grain mineral formation, *J Bacteriol.*, 174, 7971–7981,  
666 <https://doi.org/10.1128/jb.174.24.7971-7981.1992>, 1992.
- 667 Schultze-Lam, S., Schultze-Lam, S., Beveridge, T. J., and Des Marais, D. J.: Whiting events: biogenic origin due to the photosynthetic activity of cyanobacterial picoplankton,  
668 *Limnology and oceanography*, 42, 133–141, 1997.
- 669 Shinn, E. A., Steinen, R. P., Lidz, B. H., and Swart, P. K.: Whittings, a sedimentologic dilemma, *Journal of Sedimentary Research*, 59, 147–161, 1989.
- 670 Skoog, E. J., Moore, K. R., Gong, J., Ciccurese, D., Momper, L., Cutts, E. M., and Bosak, T.: Metagenomic, (bio)chemical, and microscopic analyses reveal the potential for the  
671 cycling of sulfated EPS in Shark Bay pustular mats, *ISME COMMUN.*, 2, 43, <https://doi.org/10.1038/s43705-022-00128-1>, 2022.
- 672 Stal, L., Van Gemerden, H., and Krumbein, W.: The simultaneous assay of chlorophyll and bacteriochlorophyll in natural microbial communities, *Journal of microbiological methods*,  
673 2, 295–306, 1984.
- 674 Stanton, C., Barnes, B. D., Kump, L. R., and Cosmidis, J.: A re-examination of the mechanism of whiting events: A new role for diatoms in Fayetteville Green Lake (New York,  
675 USA), *Geobiology*, 2021.
- 676 Tai, V. and Palenik, B.: Temporal variation of *Synechococcus* clades at a coastal Pacific Ocean monitoring site, *ISME J.*, 3, 903–915, <https://doi.org/10.1038/ismej.2009.35>, 2009.
- 677 Takahashi, Y., Yamaguchi, O., and Omata, T.: Roles of CmpR, a LysR family transcriptional regulator, in acclimation of the cyanobacterium *Synechococcus* sp. strain PCC 7942 to  
678 low-CO<sub>2</sub> and high-light conditions: High-light and low-CO<sub>2</sub> acclimation in cyanobacteria, *Molecular Microbiology*, 52, 837–845, <https://doi.org/10.1111/j.1365-2958.2004.04021.x>,  
679 2004.

- 680 Talling, J. F.: The Depletion of Carbon Dioxide from Lake Water by Phytoplankton, *The Journal of Ecology*, 64, 79, <https://doi.org/10.2307/2258685>, 1976.
- 681 Thompson, J. B.: Microbial whittings, *Microbial sediments*, 250–260, 2000.
- 682 Thompson, J. and Ferris, F.: Cyanobacterial precipitation of gypsum, calcite, and magnesite from natural alkaline lake water, *Geology*, 18, 995–998, 1990.
- 683 Thompson, J. B., Ferris, F. G., and Smith, D. A.: Geomicrobiology and Sedimentology of the Mixolimnion and Chemocline in Fayetteville Green Lake, New York, *PALAIOS*, 5, 52,  
684 <https://doi.org/10.2307/3514996>, 1990.
- 685 Tortell, P. D.: Evolutionary and ecological perspectives on carbon acquisition in phytoplankton, *Limnol. Oceanogr.*, 45, 744–750, <https://doi.org/10.4319/lo.2000.45.3.0744>, 2000.
- 686 Tortell, P. D., Rau, G. H., and Morel, F. M. M.: Inorganic carbon acquisition in coastal Pacific phytoplankton communities, *Limnol. Oceanogr.*, 45, 1485–1500,  
687 <https://doi.org/10.4319/lo.2000.45.7.1485>, 2000.
- 688 Townsend, D. W., Cammen, L. M., Holligan, P. M., Campbell, D. E., and Pettigrew, N. R.: Causes and consequences of variability in the timing of spring phytoplankton blooms,  
689 *Deep Sea Research Part I: Oceanographic Research Papers*, 41, 747–765, [https://doi.org/10.1016/0967-0637\(94\)90075-2](https://doi.org/10.1016/0967-0637(94)90075-2), 1994.
- 690 Trichet, J. and Defarge, C.: Non-biologically supported organomineralization, *Bulletin-Institut Oceanographic Monaco-Numero Special-*, 203–236, 1995.
- 691 Verspagen, J. M. H., Van de Waal, D. B., Finke, J. F., Visser, P. M., Van Donk, E., and Huisman, J.: Rising CO<sub>2</sub> Levels Will Intensify Phytoplankton Blooms in Eutrophic and  
692 Hypertrophic Lakes, *PLoS ONE*, 9, e104325, <https://doi.org/10.1371/journal.pone.0104325>, 2014.
- 693 Visscher, P. T., Reid, R. P., Bebout, B. M., Hoefft, S. E., Macintyre, I. G., & Thompson, J. A.: Formation of lithified micritic laminae in modern marine stromatolites (Bahamas); the  
694 role of sulfur cycling. *American Mineralogist*, 83(11-12\_Part\_2), 1482-1493, 1998.
- 695
- 696 Walker, J. M., Marzec, B., Lee, R. B. Y., Vodrazkova, K., Day, S. J., Tang, C. C., Rickaby, R. E. M., and Nudelman, F.: Polymorph Selectivity of Coccolith-Associated Polysaccharides  
697 from *Gephyrocapsa Oceanica* on Calcium Carbonate Formation In Vitro, *Adv. Funct. Mater.*, 29, 1807168, <https://doi.org/10.1002/adfm.201807168>, 2019.
- 698 Wall, R. S. and Gyi, T. J.: Alcian blue staining of proteoglycans in polyacrylamide gels using the “critical electrolyte concentration” approach, *Analytical biochemistry*, 175, 298–299,  
699 1988.
- 700 Wang, L.-L., Wang, L.-F., Ren, X.-M., Ye, X.-D., Li, W.-W., Yuan, S.-J., Sun, M., Sheng, G.-P., Yu, H.-Q., and Wang, X.-K.: pH dependence of structure and surface properties of  
701 microbial EPS, *Environmental science & technology*, 46, 737–744, 2012.
- 702 Weisse, T.: Dynamics of Autotrophic Picoplankton in Marine and Freshwater Ecosystems, in: *Advances in Microbial Ecology*, vol. 13, edited by: Jones, J. G., Springer US, Boston,  
703 MA, 327–370, [https://doi.org/10.1007/978-1-4615-2858-6\\_8](https://doi.org/10.1007/978-1-4615-2858-6_8), 1993.
- 704 Wells, A. J. and Iling, L. V.: Present-Day Precipitation of Calcium Carbonate in the Persian Gulf, 1964.
- 705 Wheeler, A., George, J. W., and Evans, C.: Control of calcium carbonate nucleation and crystal growth by soluble matrix of oyster shell, *Science*, 212, 1397–1398, 1981.
- 706 Whitton, B. A. and Potts, M.: Introduction to the Cyanobacteria, in: *Ecology of Cyanobacteria II*, edited by: Whitton, B. A., Springer Netherlands, Dordrecht, 1–13,  
707 [https://doi.org/10.1007/978-94-007-3855-3\\_1](https://doi.org/10.1007/978-94-007-3855-3_1), 2012.
- 708 Xu, H., Paerl, H. W., Qin, B., Zhu, G., Hall, N. S., and Wu, Y.: Determining Critical Nutrient Thresholds Needed to Control Harmful Cyanobacterial Blooms in Eutrophic Lake Taihu,  
709 China, *Environ. Sci. Technol.*, 49, 1051–1059, <https://doi.org/10.1021/es503744q>, 2015.
- 710 Yang, G., Li, F., Deng, Z., Wang, Y., Su, Z., Huang, L., Yin, L., and Ji, C.: Abnormal Crystallization Sequence of Calcium Carbonate in the Presence of *Synechococcus* sp. PCC 7942,  
711 *Geomicrobiology Journal*, 40, 34–45, <https://doi.org/10.1080/01490451.2022.2100948>, 2023.
- 712 Yates, K. K. and Robbins, L. L.: Production of carbonate sediments by a unicellular green alga, *American Mineralogist*, 83, 1503–1509, 1998.
- 713 Zepernick, B. N., Gann, E. R., Martin, R. M., Pound, H. L., Krausfeldt, L. E., Chaffin, J. D., and Wilhelm, S. W.: Elevated pH Conditions Associated With *Microcystis* spp. Blooms  
714 Decrease Viability of the Cultured Diatom *Fragilaria crotonensis* and Natural Diatoms in Lake Erie, *Frontiers in microbiology*, 12, 188, 2021.
- 715 Zhao, H., Han, G., Zhang, S., and Wang, D.: Two phytoplankton blooms near Luzon Strait generated by lingering Typhoon Parma: Lingering Typhoon-Induced Algae Blooms, *J.*  
716 *Geophys. Res. Biogeosci.*, 118, 412–421, <https://doi.org/10.1002/jgrg.20041>, 2013.
- 717
